# Supplementary material
Source: MDPI journal article supplement (https://www.mdpi.com/1424-2818/13/8/339)
Supplement: s1 [file s1]

|                       | Anne      | Carolyn     | Charles  | Ellen    | Katherine | Lois     | Potential Individuals Reached |                       |
|-----------------------|-----------|-------------|----------|----------|-----------|----------|-------------------------------|-----------------------|
| Family Member         | 3         | 0           | 1        | 1        | 4         |          | 9                             | Family Members        |
| Neighbor              | 0         | 0           | 1        |          |           |          | 1                             | Neighbor              |
| Friends               | 0         | 0           | 1        |          | 2         | 2        | 5                             | Friends               |
| Coworkers             | 6         | 0           |          |          | 2         |          | 8                             | Coworkers             |
| Students              | 30        | 1160        |          |          |           |          | 1190                          | Students              |
| Members of the Public | 0         | 96          | 1        |          |           |          | 97                            | Members of the Public |
| Social Media          | 1         | 2           |          | 1        |           | 1        | 5                             | Social Media          |
| <b>TOTAL</b>          | <b>40</b> | <b>1258</b> | <b>4</b> | <b>2</b> | <b>8</b>  | <b>3</b> | <b>1315</b>                   |                       |

| Participant                    | Estimated number of people reached | Source quote                                                                                                                                                                                                                                                                                                                                                                                                                                                                                                                                                                                                         |
|--------------------------------|------------------------------------|----------------------------------------------------------------------------------------------------------------------------------------------------------------------------------------------------------------------------------------------------------------------------------------------------------------------------------------------------------------------------------------------------------------------------------------------------------------------------------------------------------------------------------------------------------------------------------------------------------------------|
| Carolyn                        |                                    |                                                                                                                                                                                                                                                                                                                                                                                                                                                                                                                                                                                                                      |
| Lost Ladybug                   | 450                                | "[Lost Ladybug Project] sent me all kinds of bookmarks and things, pamphlets, things to hand out. I've given all that stuff out. I've spoken with groups of 150 children at a time because of Nature Day. I've sent that stuff out to I would say now probably 400, 500 children at all these different libraries. At least in the hands of 500 children."                                                                                                                                                                                                                                                           |
| Museum                         | 50                                 | "We co-taught a class about native bees and we had about 50 visitors..."                                                                                                                                                                                                                                                                                                                                                                                                                                                                                                                                             |
| Library                        | 60                                 | "Yeah, that was a few weeks ago. I did a presentation at the library for the kids. They have just a summer science kind of program. I went and spoke with probably ... I think there were probably 60 people there, children and adults."                                                                                                                                                                                                                                                                                                                                                                            |
| United Methodist               | 45                                 | "Then somebody there told me the next week would be a women's group, you know a church group for the United Methodist women. I went and did that talk for about an hour and a half to 45 people."                                                                                                                                                                                                                                                                                                                                                                                                                    |
| Dual Language Classroom Year 1 | 10                                 | "I'm a second grade teacher. [...] because I teach dual language, so my students are mostly Spanish speakers so we have a whole big thing about their going to Mexico, because most of them are Mexican. So that's one school. And I've been doing that I guess for five years now."                                                                                                                                                                                                                                                                                                                                 |
| Dual Language Classroom Year 2 | 10                                 | Images from class social media page showed class pictures of students ranging from 10 or more. See above.                                                                                                                                                                                                                                                                                                                                                                                                                                                                                                            |
| Dual Language Classroom Year 3 | 10                                 | Images from class social media page showed class pictures of students ranging from 10 or more. See above.                                                                                                                                                                                                                                                                                                                                                                                                                                                                                                            |
| Dual Language Classroom Year 4 | 10                                 | Images from class social media page showed class pictures of students ranging from 10 or more. See above.                                                                                                                                                                                                                                                                                                                                                                                                                                                                                                            |
| Dual Language Classroom Year 5 | 10                                 | Images from class social media page showed class pictures of students ranging from 10 or more. See above.                                                                                                                                                                                                                                                                                                                                                                                                                                                                                                            |
| PhotoClub                      | 1                                  | Social Media group for nature ID in town...direct contact with one member that Carolyn was very supportive in Identifying animals                                                                                                                                                                                                                                                                                                                                                                                                                                                                                    |
| Social Media                   | 2                                  | Bonham ISD news via FlashAlert (Artifact)                                                                                                                                                                                                                                                                                                                                                                                                                                                                                                                                                                            |
| 2nd Grade Nature Day Yr 1      | 150                                | "We had our Nature Day, the kids, it reached the entire second grade class and so there were about a hundred and fifty kids"                                                                                                                                                                                                                                                                                                                                                                                                                                                                                         |
| 2nd Grade Nature Day Yr 2      | 150                                | "This will be our fourth annual, what we call Second Grade Nature Day.                                                                                                                                                                                                                                                                                                                                                                                                                                                                                                                                               |
| 2nd Grade Nature Day Yr 3      | 150                                | See above                                                                                                                                                                                                                                                                                                                                                                                                                                                                                                                                                                                                            |
| 2nd Grade Nature Day Yr 4      | 150                                | See above                                                                                                                                                                                                                                                                                                                                                                                                                                                                                                                                                                                                            |
| <b>Total</b>                   | <b>1258</b>                        |                                                                                                                                                                                                                                                                                                                                                                                                                                                                                                                                                                                                                      |
| Anne                           |                                    |                                                                                                                                                                                                                                                                                                                                                                                                                                                                                                                                                                                                                      |
| Classroom bee lesson           | 15                                 | A bee did come into the classroom and I used the opportunity to teach the fifth grade class. I thought that I would show them the different kinds of bees. And I developed a whole unit very quickly, used materials to show them the different types of bees and the difference between wasp and bee and yellow jacket and that kind of thing. Next time a yellow jacket came through a window, they were still yelling there was "a bee". And it, you know what, the education, the opportunity, the information did (emphasis) present itself SO you know what, but I think that it's just not a one-time impact. |
| Classroom bird lesson          | 15                                 | I had done [Cornell FeederWatch] in the classroom when I was at St. Thomas with 8th grade. Also, just to be involved with our surroundings and the other creatures that are in it. And just to be aware of the animals that are around us, that we share our community with. It was always a very joyful involvement.                                                                                                                                                                                                                                                                                                |
| Family                         | 3                                  | We did it as family, a number of years. And then I had done it with the classroom.                                                                                                                                                                                                                                                                                                                                                                                                                                                                                                                                   |

|                    |           |                                                                                                        |
|--------------------|-----------|--------------------------------------------------------------------------------------------------------|
| Teachers at school | 6         | In the teachers' room, and over lunch we would discuss your work and what I did in order to be part of |
| Social Media       | 1         | Multiple project related FB posts                                                                      |
| <b>Total</b>       | <b>40</b> |                                                                                                        |

---

#### Carlton

---

|              |          |                                                                                                                                                                                                                                                                                                                                                                                                                                                                                                                                                                                           |
|--------------|----------|-------------------------------------------------------------------------------------------------------------------------------------------------------------------------------------------------------------------------------------------------------------------------------------------------------------------------------------------------------------------------------------------------------------------------------------------------------------------------------------------------------------------------------------------------------------------------------------------|
| Neighbor     | 1        | "I had a neighbor who commented to me, of course, he also had a very negative feeling about bees. He wanted to destroy every one of them on the place cus they were gonna sting him. So I talked with him, and he had bumble bees that were nesting in a big pile of grass clippings. ...I talked him out of killing them. He just left them. And I seriously was going to go over this spring and try to put some kind of domicile right in the location where they were located last year, see if I could get them to move in there (Laughter).                                         |
| Friend       | 1        | "Yes, I've talked to several people about that program. Actually I've got little red flags scattered around where I placed some of my bumble bee domiciles because they're buried in the ground. Or at least to the point that you can't see them and people have asked me about them. So I've had a chance visit with people and they'll look at you kind of funny and..."Why are you in a project like that?" And they'll spend a half an hour talking to you describing (laughter). Every body's interested once they observe what you're doing. And they like to learn more about it. |
| Passerby     | 1        | " I have changed a number of people's opinions after I explain to them the project and changed their attitudes to more tolerance and curiosity... Finding they'll start observing and casually see them somewhere. They'll comment on what they've seen last week or something like that so they actually take a positive attitude and find an interesting discussion point. I have noticed that.                                                                                                                                                                                         |
| <b>Total</b> | <b>3</b> |                                                                                                                                                                                                                                                                                                                                                                                                                                                                                                                                                                                           |

---

#### Katherine

---

|                        |          |                                                                                                                                                                                                                                                                                                                                                                                 |
|------------------------|----------|---------------------------------------------------------------------------------------------------------------------------------------------------------------------------------------------------------------------------------------------------------------------------------------------------------------------------------------------------------------------------------|
|                        | 4        | 3: "I know that I told my sister-in-law about it, and she was really excited, and was interested to find out if we do get bees in the house, or just about what kind of bees we have and things like that. It has led to conversation about milkweed, " / She said that her kids have never seen a caterpillar before. Yeah, and so I was trying to ... They have property too. |
| Family                 |          | 1: Then, I would say from my interest, my mom has now become more interested. We'll talk about what plants she's going to put out this year, what new ones we're going to get and try. I feel like it's having a small impact, like more people around me are getting interested as well.                                                                                       |
| Coworkers              | 2        | "I'm pretty sure I told a couple people at work about it. They were interested too, just said, wow, that's kind of cool. I've never heard of citizen science projects like that, that people can get involved with."                                                                                                                                                            |
| Friends / Social Media | 2        | "I try not to get defensive. I try to just stay positive and encourage people, and I try to explain why bees are important, or any insect, because a lot of people don't like them. They're creeped out by them, but for the most part, there's nothing to be bothered by, I guess."                                                                                            |
| <b>Total</b>           | <b>8</b> |                                                                                                                                                                                                                                                                                                                                                                                 |

---

#### Lois

---

|              |          |                                                                                                                                                                                                                                  |
|--------------|----------|----------------------------------------------------------------------------------------------------------------------------------------------------------------------------------------------------------------------------------|
| Friends      | 2        | "They know me well enough. 'Oh, Lois. (Laughter) I'm always trying to encourage the furry creatures and the beasties. I'm all about nature and all that so they're not surprised. They're interested but they're not surprised." |
| Neighbor     | 1        | "I'm just seeing what I like and what I think works and hoping to have something by me that I can show off to my friends and neighbors when they come over."                                                                     |
| Social Media | 1        | Multiple project related FB posts                                                                                                                                                                                                |
| <b>Total</b> | <b>4</b> |                                                                                                                                                                                                                                  |

---

#### Ellen

---

|              |          |                                                        |
|--------------|----------|--------------------------------------------------------|
| Family       | 1        | "[My son] is here with me, so he was into it as well." |
| Social Media | 1        | Post shared on personal page                           |
| <b>Total</b> | <b>2</b> |                                                        |
