# Supplementary material
Source: MDPI journal article supplement (https://www.mdpi.com/1424-2818/13/8/339)
Supplement: s1 [file s1]

Initial interview with research participant

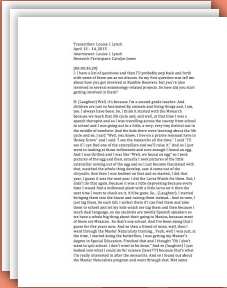

Transcript and Codes

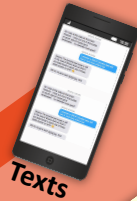

Texts

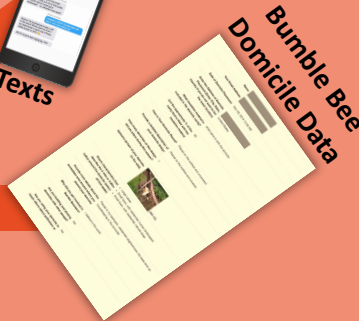

Bumble Bee Domicile Data

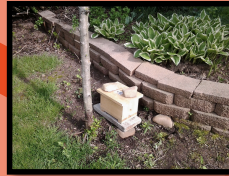

Photos

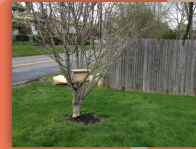

Photos

Follow up interview with research participant

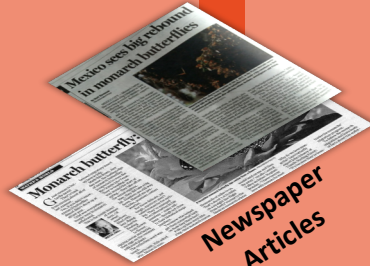

Newspaper Articles

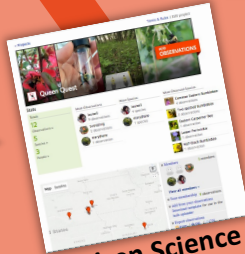

Citizen Science Participation

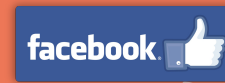

Social media posts

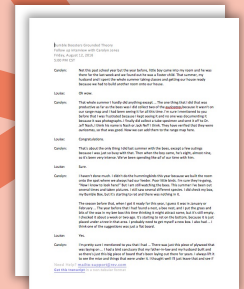

Transcript and Codes

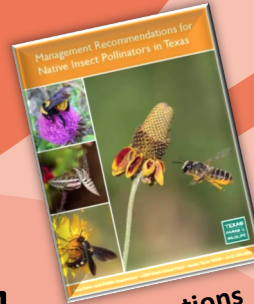

Publications

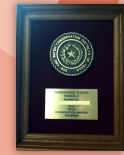

Awards

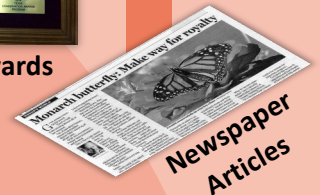

Newspaper Articles

Snowball interview with someone influenced by research participant

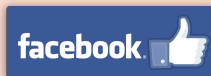

Social media posts

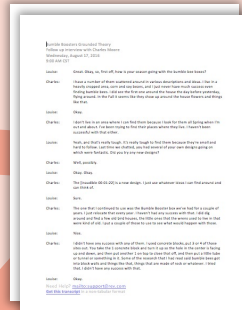

Transcript and Codes

Secondary docs

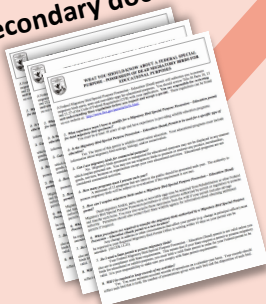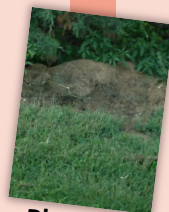

Photos

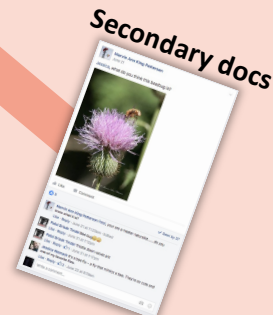

Secondary docs
