# Supplementary material
Source: MDPI journal article supplement (https://www.mdpi.com/1424-2818/13/8/339)
Supplement: s1 [file s1]

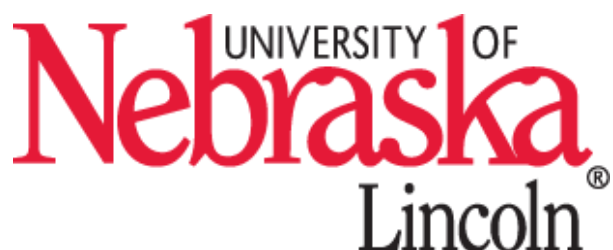

## **Research Participant Informed Consent Form Bumble Boosters Citizen Scientist**

IRB Approval # 20150415239 EX

### **Experiences of Citizen Scientists in Entomology Research**

Purpose of Research: The purpose of this research is to describe the experiences of citizen scientists, like you, involved in entomology research. This research is intended to increase understanding of citizen scientists' experiences, to illustrate the impacts of your involvement and improve the experiences of citizen scientists in entomology-based citizen science programs. You must be **19** years of age or older and a citizen scientist involved in the Bumble Boosters citizen science program in order to participate in this research.

Specific Procedures to be Used: You will be asked to participate in a one-on-one interview discussing your experiences as a citizen scientist involved in entomology research. Interviews will be audio recorded for transcription purposes and deleted within 30 days of the interview. You will be asked to complete a short demographic questionnaire. Up to three follow up interviews may be requested – these will be shorter in duration. You may be asked to provide documents related to your participation in your entomology citizen science program. These might include copies of a research journal, photographs you have taken that relate to the citizen science project, letters written to a local newspaper, education program fliers, books purchased relating to the project, Facebook posts, etc. You may be asked to share names and contact information of people with whom you shared the Bumble Boosters program. Providing this information is entirely voluntary.

Duration of Participation: A one-on-one interview (completed in person, online or via telephone) will take about 45 minutes to complete. This length may be shorter or longer depending on your experiences and input. In person interviews will take place in a private room at UNL's Entomology Hall or at a mutually agreed upon location. Up to three additional interviews may be requested to clarify your experiences. Additional interviews may take about 30 minutes each, depending on your experiences and input. An analysis of your interview(s) will be made available for your review and to ensure that it accurately represents your experiences.

Compensation: A \$25 Amazon gift card will be provided upon completion of any follow up interviews.

Risks: There are no known risks or discomfort associated with this research.

Benefits: By participating in this research, you will have opportunity to share your experience and knowledge as a citizen scientist involved in entomology research. You will contribute to understanding of and literature in the field of citizen science. You will participate in another aspect of citizen science, incorporating social research. Ultimately, this will assist in informing and improving the educational benefits and experiences of citizen scientists.

Freedom to Withdraw: Participation in this study is voluntary. You can refuse to participate or withdraw at any time without harming your relationship with the researchers, the citizen science program you are involved in or the University of Nebraska-Lincoln or in any other way receive a penalty or loss of benefits to which you are otherwise entitled.

Confidentiality: No information identifying you to research results will be published. Your interview will be recorded for transcription. This recording will be destroyed after transcription has been completed. The information, including consent forms, that you provide will be kept on a password-protected computer or in a locked filing cabinet in 220 Entomology Hall at the University of Nebraska-Lincoln. You will be provided an alias – all data analysis will refer to this alias and not your name. These data will be destroyed five years after publication of study results. Identifying information will not appear in any written report or presentation.

Opportunity to Ask Questions: You may ask any questions concerning this research at anytime during your interview(s) or by contacting Louise I. Lynch (402-472-8692 or [lilynch@huskers.unl.edu](mailto:lilynch@huskers.unl.edu)). If you would like to speak to someone else, please call the Research Compliance Services Office at (402) 472-6965 or [irb@unl.edu](mailto:irb@unl.edu).

**Name and Contact Information of Investigators**

Louise I. Lynch, Principal Investigator, (402) 472 – 8692, [lilynch@huskers.unl.edu](mailto:lilynch@huskers.unl.edu)

Dr. Doug Golick, Secondary Investigator, (402) 472 – 8642, [dgolick2@unl.edu](mailto:dgolick2@unl.edu)

I am 19 years of age or older (please check one):

☐ Yes

☐ No

I am a participant in the Bumble Boosters citizen science program (please check one):

- ☐ Yes
- ☐ No

Consent for Interviews to be Audio Recorded

I understand that the interviews will be audio recorded for transcription purposes and that the audio files will be saved for a period of up to 30 days. **Please check one:**

I Agree

☐

I Do Not Agree

☐

Confirmation of Anonymity

All data and documents submitted by you (including photographs related to your participation in Bumble Boosters, letters to newspapers, education program fliers, books purchased, calendar events, Facebook posts, etc.) is stripped of personally identifiable information and kept anonymous when published and reported. Please confirm this below or indicate that you want to have your name attributed in presentations, photographs, etc.

- ☐ I wish to **be credited** for any photographs, articles or other data I provide, where applicable.
- ☐ I wish to **remain anonymous**.

Consent, Right to Receive a Copy: You are voluntarily making a decision whether or not to participate in this research study. By typing your full name below and clicking on the "I Agree" button below, your consent to participate is implied. You should print a copy of this page for your records.

I Agree

☐

I Do Not Agree

☐

**Please type your full name below. This will serve as your signature and implies your consent to participate in this research.**

**Today's Date:**

**Please provide an email address so that a PDF version of this consent form may be sent to you.**

Interview Script: Primary Research Participants (Citizen Scientists)

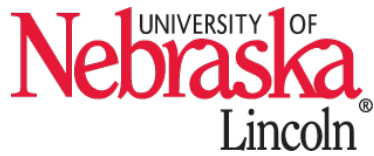

INSTITUTE OF AGRICULTURE AND NATURAL RESOURCES  
Department of Entomology  
103 Entomology Hall, East Campus  
Lincoln, NE 68583

**Principal Investigator: Louise I Lynch, Graduate Research Assistant**  
**Department of Entomology, University of Nebraska-Lincoln**

Time of Interview: \_\_\_\_\_

Date: \_\_\_\_\_

Location: \_\_\_\_\_

Interviewer: \_\_\_\_\_

Participant ID Number: \_\_\_\_\_

This is \_\_\_\_\_ with research participant \_\_\_\_\_. Do I have your permission to begin the interview?

- 1) Tell me about how you got involved in (your decision to join) Bumble Boosters.
- 2) Tell me about your role in this project.
  - a. Can you think of an example of that activity?
  - b. What do you enjoy most about participating in [named citizen science project]?
  - c. What do you like least about participating in [named citizen science project]?
- 3) How do you feel you have benefitted from participating?
- 4) Do you ever reflect or write about what you do?
  - a. Can you tell me about that?
- 5) Can you think of an instance when you shared something from [named citizen science project] with someone who wasn't involved in the project?
  - a. Why did you share this with them?
  - b. How did you share these experiences with them?
  - c. What was their reaction?
  - d. What about family members? Neighbors?
  - e. Other community members or organizations?
- 6) Did you ever have to stop your participation? Why? What brought you back?
- 7) Did you ever think about stopping your participation? Why not? What kept you from leaving? How did you change things?
- 8) Do you think [named citizen science project] has changed your views on how science works? Why do you think this changed? How did you change this?

## Interview Script: Primary Research Participants (Citizen Scientists)

- 9) Do you think [named citizen science project] has changed your views on insects? Why do you think this changed? How did you change this? What are your interactions with insects like in this project?
- 10) Do you think [named citizen science project] has changed the way you do things today? Why do you think this changed? How did you change this?
- 11) Do you feel the way you participate has changed over the years? How has it changed? Can you give me an example?
- 12) Are there any strong memories or observations that stick out in your mind about this project that you would like to share?
- 13) Is there anything else that you feel I should understand better?
- 14) Is there anything that you would like to ask me?

- 15) Do you think [name of snowball participant] might be interested in sharing their memories about your interaction with them?

If “no”: Ok thanks!

If “yes”: Ok great! I can (a): send you my contact info and a little note to pass on to them, or, if you’re comfortable with it, (b): if you can give me their contact info, I’ll reach out to them directly. Which would you prefer?

If (a): Great. I’ll send this information to you in an email.

If (b): Great. I would have to identify you when I contact them, as one of the reasons I’m reaching out. Are you ok with that?

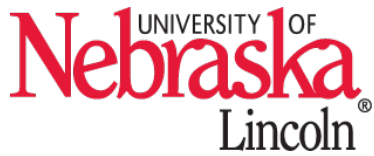

**Principal Investigator: Louise I Lynch, Graduate Research Assistant**  
**Department of Entomology, University of Nebraska-Lincoln**

Time of Interview: \_\_\_\_\_

Date: \_\_\_\_\_

Location: \_\_\_\_\_

Interviewer: \_\_\_\_\_

Participant ID Number: \_\_\_\_\_

1. Tell me about how your second and third bumble boosters seasons are going?
  - a. What did you do?
  - b. What did you observe?
  - c. Can you think of an example of that activity?
  - d. How did you go about learning more about bumble bees? What resources did you use?
2. You've suggested that you are influencing change in others by [describe influence]. Can you confirm and comment on this?
  - a. What drives you to talk to people and share your knowledge about and attitudes towards insects?
  - b. Do people indicate that you've changed their attitudes and behaviors?
  - c. Who, or what, do you think has been the biggest influence on *you*?
3. It seems as though you have assumed the role of expert to people around you. Can you confirm or comment on this?
  - a. Do people come to you with questions about bumble bees, honey bees, etc.?
  - b. How do you feel about this role?
4. You seem to have a long term interest in nature and science. Can you confirm and comment on this?
  - a. For you, how does citizen science fit in to/benefit this long term interest?
5. Do you feel the way you participate has changed over the years?
  - a. How has it changed?
  - b. Can you give me an example?
6. Can you think of an instance when you shared something from Bumble Boosters with someone who wasn't involved in the project?
  - a. Why did you share this with them?
  - b. How did you share these experiences with them?
  - c. What was their reaction?

## Follow up interview questions for Bumble Boosters research participants

- d. What about family members? Neighbors?
  - e. Other community members or organizations?
7. The 2014 domicile design was, overall, a failed design. What are your thoughts on this? How does this make you feel? Will you keep trying designs? How?
  8. Did you ever think about stopping your participation? Why not? What kept you from leaving? How did you change things?
  9. Looking back over the past couple of years, how have your views of or interactions with science changed? Why do you think this changed? How did you change this? Do you think this is related to the bumble Boosters program? How?
  10. Looking back over the past couple of years, how have your views or interactions with insects changed? Why do you think this changed? How did you change this? Do you think this is related to the bumble Boosters program? How?
  11. Do you think Bumble Boosters has changed the way you do things today? Why do you think this changed? How did you change this?
  12. Are there any strong memories or observations that stick out in your mind about this project that you would like to share?
  13. Have you joined or participated in any other citizen science programs? Why did you join? Tell me about your role in these projects?
  14. What have you enjoyed most/least about participating?
  15. Is there anything else that you feel I should understand better?
  16. Is there anything that you would like to ask me?
  17. Do you think [name of snowball participant] might be interested in sharing their memories about your interaction with them?
    - If “no”: Ok thanks!
    - If “yes”: Ok great! I can (a): send you my contact info and a little note to pass on to them, or, if you’re comfortable with it, (b): if you can give me their contact info, I’ll reach out to them directly. Which would you prefer?
      - If (a): Great. I’ll send this information to you in an email.
      - If (b): Great. I would have to identify you when I contact them, as one of the reasons I’m reaching out. Are you ok with that?

## Default Question Block



### **Research Participant Informed Consent Form Bumble Boosters Broader Impacts Participant**

IRB Approval # 20150415239 EX

Purpose of Research: The purpose of this research is to describe the broader impacts of the Bumble Boosters program. You must be **19** years of age or older and have interacted with a citizen scientist involved in the Bumble Boosters citizen science program in order to participate in this research.

Specific Procedures to be Used: You will be asked to participate in a one-on-one interview (over the phone or in person) discussing your interactions with a Bumble Boosters citizen scientist. Interviews will be audio recorded for transcription purposes and deleted within 30 days of the interview. You will be asked to complete a short demographic questionnaire. You may be asked to provide documents related to your interaction with the Bumble Boosters citizen scientist. These might include photographs you have taken that relate to the citizen science project, letters written to a local newspaper, education program fliers, books purchased relating to the project, Facebook posts, etc. You may be asked to share names and contact information of people with whom you shared the Bumble Boosters program. Providing this information is *entirely* voluntary.

Duration of Participation: A one-on-one interview (completed in person or via telephone) will take about 25 minutes to complete. This length may be shorter or longer depending on your experiences and input. In person interviews will take place in a private room at UNL's Entomology Hall or at a mutually agreed upon location. A short demographic survey, provided at the end of this consent form, will take 5 minutes to complete.

Compensation: A \$25 Amazon.com gift card will be provided upon completion of your interview.

Risks: There are no known risks or discomfort associated with this research.

Benefits: By participating in this research, you will have opportunity to share your experience and knowledge as a citizen interacting with UNL entomology outreach programs. You will contribute to understanding of and literature in the field of citizen science.

Freedom to Withdraw: Participation in this study is voluntary. You can refuse to participate or withdraw at any time without harming your relationship with the researchers or the University of Nebraska-Lincoln or in any other way receive a penalty or loss of benefits to which you are otherwise entitled.

Confidentiality: No information identifying you to research results will be published. Your interview will be recorded for transcription. This recording will be destroyed after transcription has been completed. The information, including consent forms, that you provide will be kept on a password-protected computer or in a locked filing cabinet in 220 Entomology Hall at the University of Nebraska-Lincoln. You will be provided an alias – all data analysis will refer to this alias and not your name. These data will be destroyed five years after publication of study results. Identifying information will not appear in any written report or presentation.

Opportunity to Ask Questions: You may ask any questions concerning this research at anytime during your interview(s) or by contacting Louise I. Lynch (402-472-8692 or [lilynch@huskers.unl.edu](mailto:lilynch@huskers.unl.edu)). If you would like to speak to someone else, please call the Research Compliance Services Office at (402) 472-6965 or [irb@unl.edu](mailto:irb@unl.edu).

**Name and Contact Information of Investigators**

Louise I. Lynch, Principal Investigator, (402) 472 – 8692, [lilynch@huskers.unl.edu](mailto:lilynch@huskers.unl.edu)

Dr. Doug Golick, Secondary Investigator, (402) 472 – 8642, [dgolick2@unl.edu](mailto:dgolick2@unl.edu)

**I am 19 years of age or older (please check one):**

☐ Yes

☐ No

**Consent for Interviews to be Audio Recorded**

**I understand that the interviews will be audio recorded for transcription purposes and that the audio files will be saved for a period of up to 30 days. Please check one:**

I Agree

☐

I Do Not Agree

☐

### Confirmation of Anonymity

All data and documents submitted by you (including photographs you have taken related to your participation in Bumble Boosters, letters to newspapers, education program fliers, books purchased, calendar events, Facebook posts, etc.) is stripped of personally identifiable information and kept anonymous when published and reported. Please confirm this below or indicate that you want to have your name attributed in presentations, photographs, etc.

- ☐ I wish to **be credited** for any photographs, articles or other data I provide, where applicable.
- ☐ I wish to **remain anonymous**.

Consent, Right to Receive a Copy: You are voluntarily making a decision whether or not to participate in this research study. By typing your full name below and clicking on the "I Agree" button below, your consent to participate is implied. You should print a copy of this page for your records.

I Agree

☐

I Do Not Agree

☐

**Please type your full name below. This will serve as your signature and implies your consent to participate in this research.**

**Please provide an email address where we can contact you with questions about this form, if needed.**

**Thanks for joining this study! If you have any questions or technical difficulties while completing this survey, please contact Louise I. Lynch at [lilynch@huskers.unl.edu](mailto:lilynch@huskers.unl.edu).**

**To get started, here are a few quick, demographic questions about you...**

**As of today, what is your age?**

**(Years)**

**What is your sex?**

- ☐ Male
- ☐ Female
- ☐ Other (please specify)
- 

**What is the highest level of formal education you have achieved?**

**Are you or have you ever been employed as a scientist, researcher or science educator?**

- ☐ No
- ☐ Yes
- ☐ If yes, what is your title?
- 

**Do you use science in your daily activities?**

- ☐ No.
- ☐ Yes. An example is...
- 

**Please specify your ethnic background.**

- ☐ American Indian or Alaska Native
- ☐ Asian American
- ☐ Black or African American
- ☐ Hispanic or Latino
- ☐ Native Hawaiian or Pacific Islander
- ☐ White
- ☐ Other (Please specify)
-

Interview Script Snowball Sampling

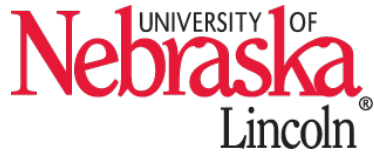

INSTITUTE OF AGRICULTURE AND NATURAL RESOURCES  
Department of Entomology  
103 Entomology Hall, East Campus  
Lincoln, NE 68583

**Principal Investigator: Louise I Lynch, Graduate Research Assistant**  
**Department of Entomology, University of Nebraska-Lincoln**

Time of Interview: \_\_\_\_\_

Date: \_\_\_\_\_

Location: \_\_\_\_\_

Interviewer: \_\_\_\_\_

Participant ID Number: \_\_\_\_\_

This is \_\_\_\_\_ with research participant \_\_\_\_\_. Do I have your permission to begin the interview?

1. [Describe interaction with Bumble Boosters participant.] Can you tell me a little bit about this interaction? What do you recall from that day/ interaction?
2. What were your initial thoughts when this happened?
3. What did you do or think following the interaction?
4. What sticks out in your memory regarding this interaction?
5. Did this interaction change how you view insects? How so?
6. Did this interaction change your views on how science works? How so?
7. Did this interaction change how you do things today (on your property, for example)?
8. Can you think of an instance when you shared this interaction with someone else?  
A family member, friend, neighbor, etc.?
9. Is there anything else you think I should understand better?
10. Is there anything that you would like to ask me?
