# Supplementary material
Source: MDPI journal article supplement (https://www.mdpi.com/1424-2818/13/8/339)
Supplement: s1 [file s1]

| Code System                                               | Ellen... | Charles ... | Anne ... | Carol... | Katherine... | Lois ... | 2014 ... | 2015 |
|-----------------------------------------------------------|----------|-------------|----------|----------|--------------|----------|----------|------|
| ▶  QUESTIONS                                              |          |             |          |          |              |          |          |      |
| ▶  Following citizen scientist protocol                   |          |             |          |          |              |          |          |      |
| ▶  Learning with citizen science participation            |          |             |          |          |              |          |          |      |
| ▶  Enacting environmental changes through citizen science |          |             |          |          |              |          |          |      |
| ▶  Experiencing internal impacts through citizen science  |          |             |          |          |              |          |          |      |
| ▶  Cascading impacts of citizen scientists                |          |             |          |          |              |          |          |      |
| ▶  Being "about nature"                                   |          |             |          |          |              |          |          |      |
| ▶  Reasons for getting involved                           |          |             |          |          |              |          |          |      |
| ▶  Broadcasting citizen science educational objectives    |          |             |          |          |              |          |          |      |
| ▶  Assuming the role of expert                            |          |             |          |          |              |          |          |      |
| ▶  Tempering fear of insects                              |          |             |          |          |              |          |          |      |
| ▶  Experiencing the trying sides of science               |          |             |          |          |              |          |          |      |
| ▶  Enjoying the act of learning science                   |          |             |          |          |              |          |          |      |
| ▶  Glass ceilings in citizen science                      |          |             |          |          |              |          |          |      |
| ▶  Journaling to connect with nature                      |          |             |          |          |              |          |          |      |
| ▶  Thinking and acting scientifically                     |          |             |          |          |              |          |          |      |
| ▶  Describing a scientist                                 |          |             |          |          |              |          |          |      |
| ▶  Existing aversion to insecticides                      |          |             |          |          |              |          |          |      |

| Code System                                               | Ellen... | Charles ... | Anne ... | Carol... | Katherine... | Lois ... | 2014 ... | 2015 |
|-----------------------------------------------------------|----------|-------------|----------|----------|--------------|----------|----------|------|
| ▼  Following citizen scientist protocol                   |          |             |          |          |              |          |          |      |
| Photographing bumble bee queen                            |          |             |          |          |              |          |          |      |
| Following project updates on Facebook                     |          |             |          |          |              |          |          |      |
| ▶  Monarch Watch                                          |          |             |          |          |              |          |          |      |
| Observing domicile for inhabitants                        |          |             |          |          |              |          |          |      |
| Observing no bee inhabitants                              |          |             |          |          |              |          |          |      |
| Obtaining a domicile                                      |          |             |          |          |              |          |          |      |
| Placing Bumble Boosters domicile                          |          |             |          |          |              |          |          |      |
| Putting domicile together                                 |          |             |          |          |              |          |          |      |
| Requesting domicile kit                                   |          |             |          |          |              |          |          |      |
| Submitting data to project                                |          |             |          |          |              |          |          |      |
| Trying out a domicile                                     |          |             |          |          |              |          |          |      |
| ▶  Using extra solitary bee house                         |          |             |          |          |              |          |          |      |
| Wanting guidance in setting up domicile correctly         |          |             |          |          |              |          |          |      |
| ▼  Learning with citizen science participation            |          |             |          |          |              |          |          |      |
| Focusing outreach on favorite three insects               |          |             |          |          |              |          |          |      |
| ▼  Learning how to identify bumble bees                   |          |             |          |          |              |          |          |      |
| Being persistent with learning bumble bee specie          |          |             |          |          |              |          |          |      |
| Collaborating with local bumble bee researcher            |          |             |          |          |              |          |          |      |
| Obtaining ID materials from an expert                     |          |             |          |          |              |          |          |      |
| Seeking identification of bumble bee photos               |          |             |          |          |              |          |          |      |
| Using identification booklets to ID bumble bees           |          |             |          |          |              |          |          |      |
| ▼  Metacognition                                          |          |             |          |          |              |          |          |      |
| Barreling of new knowledge through science expe           |          |             |          |          |              |          |          |      |
| Learning process for getting to know nature               |          |             |          |          |              |          |          |      |
| One thing leading to another                              |          |             |          |          |              |          |          |      |
| Not aware of other citizen science projects               |          |             |          |          |              |          |          |      |
| ▼  Reading and researching to learn more                  |          |             |          |          |              |          |          |      |
| Avoiding over-technical texts                             |          |             |          |          |              |          |          |      |
| Exploring an unknown organism                             |          |             |          |          |              |          |          |      |
| Seeking out books to learn about new discoveries          |          |             |          |          |              |          |          |      |
| Sharing observations with expert                          |          |             |          |          |              |          |          |      |
| Wanting to share experiences with other Bumble Boo        |          |             |          |          |              |          |          |      |
| ▶  Enacting environmental changes through citizen science |          |             |          |          |              |          |          |      |



| Code System                                              | Ellen... | Charles ... | Anne ... | Carol... | Katherine... | Lois ... | 2014 ... | 2015 |
|----------------------------------------------------------|----------|-------------|----------|----------|--------------|----------|----------|------|
| ▼  Experiencing internal impacts through citizen science |          |             |          |          |              |          |          |      |
| Joining new citizen science because of one project       |          |             |          |          |              |          |          |      |
| Opening up to new perspectives                           | ■        |             |          | ■        |              | ■        |          |      |
| ▼  Attitude towards insects                              |          |             |          |          |              |          |          |      |
| Feeling more comfortable around insects through          |          |             |          | ■        | ■            |          |          |      |
| Getting hooked on monarchs                               |          |             |          | ■        |              |          |          |      |
| Seeing beauty in insects                                 |          |             | ■        |          |              |          |          |      |
| Seeing insects with more interest                        |          |             | ■        |          |              |          |          |      |
| ▼  Awareness of insects                                  |          |             |          |          |              |          |          |      |
| "Paying closer attention to things that are going c      |          | ■           |          |          |              |          |          |      |
| Becoming more aware of bee activity                      | ■        |             |          |          |              |          |          |      |
| Concentrating more on insects because of progra          |          | ■           |          |          |              |          |          |      |
| Gaining new awareness of bee diversity                   | ■        |             |          |          |              |          |          |      |
| Increasing awareness of insects' environmental vi        | ■        |             | ■        |          |              |          |          |      |
| Making more observations because of citizen scie         | ■        |             |          |          | ■            |          |          |      |
| Observing bees in nature                                 |          |             |          |          |              | ■        |          |      |
| Observing to acting on monarchs                          |          |             |          | ■        |              |          |          |      |
| ▼  Changing proenvironmental behaviors                   |          |             |          |          |              |          |          |      |
| Becoming more aware of ways to help bumble bee           |          |             |          |          | ■            |          |          |      |
| Opening up to new practices                              |          |             |          |          | ■            | ■        |          |      |
| Paying closer attention to property                      | ■        |             |          |          |              |          |          |      |
| Preferring pollinator habitat to grass                   |          |             |          |          |              | ■        |          |      |
| Questioning practice of mowing property                  |          |             |          |          | ■            |          |          |      |
| ▼  Gaining confidence to communicate with new audien     |          |             |          |          |              |          |          |      |
| Changing relationship with adults due to role as e       |          |             |          | ■        |              |          |          |      |
| Developing internal approach to adult audiences          |          |             |          | ■        |              |          |          |      |
| Feeling less intimidated by science presentations        |          |             |          | ■        |              |          |          |      |
| Perceiving adults as stubborn                            |          |             |          | ■        |              |          |          |      |
| Perceiving children as more reachable than adults        |          |             |          | ■        |              |          |          |      |
| Realizing that people/adults, too, are interested in     |          |             |          | ■        |              |          |          |      |
| Recognizing that people actually like bees despite       |          | ■           |          |          |              |          |          |      |
| Teaching science adults as an unforeseen practic         |          |             |          | ■        |              |          |          |      |
| ▼  Gaining more knowledge                                |          |             |          |          |              |          |          |      |
| Becoming more knowledgeable about bees throug            |          |             |          |          | ■            |          |          |      |
| Learning about bees through citizen science              |          |             |          |          | ■            |          |          |      |
| ▶  Cascading impacts of citizen scientists               |          | ■           | ■        | ■        | ■            | ■        |          |      |

| Code System                                         | Ellen... | Charles ... | Anne ... | Carol... | Katherine... | Lois ... | 2014 ... | 2015 |
|-----------------------------------------------------|----------|-------------|----------|----------|--------------|----------|----------|------|
| ▼  Cascading impacts of citizen scientists          |          |             |          |          |              |          |          |      |
| ▼  Initiating the cascade                           |          |             |          |          |              |          |          |      |
| Exploring something beyond one's responsibility:    |          |             | ■        |          |              |          |          |      |
| Observing bumble bee queens in the wild             |          |             |          | ■        |              |          |          |      |
| Offering own property for students to learn         |          |             |          | ■        |              |          |          |      |
| Stepping out of one's immediate circle              |          |             | ■        |          |              |          |          |      |
| Using citizen science to be involved with creature  |          |             | ■        |          |              |          |          |      |
| ▼  "Over the fence": Sharing with neighbors         |          |             |          |          |              |          |          |      |
| Placing domicile on other peoples' property         |          |             |          |          |              |          |          |      |
| Approaching neighbor that wanted to destroy bur     |          | ■           |          |          |              |          |          |      |
| Convincing neighbor to leave bumble bee nest alc    |          | ■           |          |          |              |          |          |      |
| Discussing pollinator habitat problems with neigh   |          | ■           |          |          |              |          |          |      |
| Sharing garden with neighborhood                    |          |             |          |          |              | ■        |          |      |
| Showing off gardening hobby to friends and neigh    |          |             |          |          |              | ■        |          |      |
| ▼  Coworkers: Sharing at work                       |          |             |          |          |              |          |          |      |
| Awakening new insect awareness in co-workers        |          |             |          | ■        |              |          |          |      |
| Effecting science in other teachers' classrooms     |          |             |          | ■        |              |          |          |      |
| Exposing other teachers to ladybug diversity        |          |             |          | ■        |              |          |          |      |
| Needing multiple interactions to change bee perc    |          |             | ■        |          |              |          |          |      |
| ▼  Outreach: Sharing through public presentations   |          |             |          |          |              |          |          |      |
| Master Naturalist classes                           |          |             |          | ■        |              |          |          |      |
| Teaching Master Naturalist classes                  |          |             |          | ■        |              |          |          |      |
| Public presentation                                 |          |             |          | ■        |              |          |          |      |
| Museum presentation                                 |          |             |          | ■        |              |          |          |      |
| Sharing knowledge at local museum                   |          |             |          | ■        |              |          |          |      |
| ▼  Passerbys: Conversations in passing              |          |             |          |          |              |          |          |      |
| Being asked about buried designs and red flags      |          | ■           |          |          |              |          |          |      |
| Changing opinions about bees through conversat      |          | ■           |          |          |              |          |          |      |
| Showing off the domicile to others                  |          |             |          |          |              | ■        |          |      |
| ▼  Sharing with family                              |          |             |          |          |              |          |          |      |
| Talking about the domicile with coming season       |          |             | ■        |          |              |          |          |      |
| Affecting mother's participation in planting native |          |             |          |          | ■            |          |          |      |
| Enjoying spouse's experiment with domicile appe     |          |             | ■        |          |              |          |          |      |
| Using citizen science for family time               |          |             | ■        |          |              |          |          |      |
| ▼  Teaching: bringing science to students           |          |             |          |          |              |          |          |      |
| Qualitative research on students                    |          |             |          | ■        |              |          |          |      |



| Code System                                              | Ellen... | Charles ... | Anne ... | Carol... | Katherine... | Lois ... | 2014 ... | 2015 |
|----------------------------------------------------------|----------|-------------|----------|----------|--------------|----------|----------|------|
| ▼ Being "about nature"                                   |          |             |          |          |              | ■        |          |      |
| Being known as nature enthusiast                         |          |             |          |          |              | ■        |          |      |
| Observing resting bees in flowers on property            | ■        |             |          |          |              |          |          |      |
| Going back in time on prairie remnant property           |          |             |          | ■        |              |          |          |      |
| Making casual observations of other animals              |          | ■           |          |          |              |          |          |      |
| Watching daughter take care of insects influenced se     |          |             | ■        |          |              |          |          |      |
| Observing daughter releasing insects as a learned be     |          |             | ■        |          |              |          |          |      |
| Being unable to kill insects for collections             |          |             |          | ■        |              |          |          |      |
| Disliking grass                                          |          |             |          |          |              | ■        |          |      |
| Enjoying bee observations                                |          | ■           |          |          |              |          |          |      |
| Finding enjoyment simply in watching bees                |          | ■           |          |          |              |          |          |      |
| ▼ Growing up with nature                                 |          |             |          |          |              |          |          |      |
| Acknowledging biodiversity in the city                   |          |             |          |          | ■            |          |          |      |
| Growing up in a rural area                               |          |             |          |          | ■            |          |          |      |
| Losing access to nature due to city move                 |          |             |          |          | ■            |          |          |      |
| Missing nature due to living in city                     |          |             |          |          | ■            |          |          |      |
| Having familiarity with milkweed species on property     |          |             |          | ■        |              |          |          |      |
| Identifying self as hobbyist, not scientist              |          |             |          |          |              | ■        |          |      |
| ▼ Preexisting interest in science/nature                 |          |             |          |          |              |          |          |      |
| Existing awareness of bee diversity                      |          |             |          |          | ■            |          |          |      |
| Existing interest in nature/bees                         |          | ■           |          |          | ■            |          |          |      |
| Existing positive attitude about insects and nature      |          |             |          |          | ■            |          |          |      |
| Having broad interests in frogs and hummingbirds         |          |             |          | ■        |              |          |          |      |
| Keeping bees for entertainment/hobby                     |          | ■           |          |          |              |          |          |      |
| Long term interest in flowers and gardening              |          |             |          |          |              | ■        |          |      |
| Long term interest in science                            |          | ■           |          |          |              |          |          |      |
| Possessing long term interest in nature                  |          | ■           |          |          | ■            |          |          |      |
| Producing honey for family, not profit                   |          | ■           |          |          |              |          |          |      |
| Relating students' interest in nature to own long term i |          |             |          | ■        |              |          |          |      |
| Uncovering a bumble bee nest at home                     |          |             |          | ■        |              |          |          |      |
| Valuing presence of bees                                 |          |             |          |          |              | ■        |          |      |
| ► Reasons for getting involved                           | ■        | ■           | ■        | ■        | ■            | ■        |          |      |
| ► Broadcasting citizen science educational objectives    | ■        | ■           | ■        | ■        | ■            | ■        |          |      |
| ► Assuming the role of expert                            |          | ■           | ■        | ■        |              |          |          |      |
| ► Tempering fear of insects                              | ■        | ■           | ■        | ■        | ■            | ■        |          |      |

| Code System                                                    | Ellen... | Charles ... | Anne ... | Carol... | Katherine... | Lois ... | 2014 ... | 2015 |
|----------------------------------------------------------------|----------|-------------|----------|----------|--------------|----------|----------|------|
| ▼ Reasons for getting involved                                 |          |             |          |          |              |          |          |      |
| ▼ Getting excited about science                                |          |             |          |          |              |          |          |      |
| Being fascinated with monarch egg observations                 |          |             |          |          |              |          |          |      |
| Being thrilled about discovering eggs                          |          |             |          |          |              |          |          |      |
| Exciting to be involved in citizen science                     |          |             |          |          |              |          |          |      |
| Feeling excitement when receiving domicile kit                 |          |             |          |          |              |          |          |      |
| Getting excited about offering domicile                        |          |             |          |          |              |          |          |      |
| ▼ Being part of a larger effort                                |          |             |          |          |              |          |          |      |
| Doing something novel                                          |          |             |          |          |              |          |          |      |
| Feeling like she's not doing much for Bumble Boo               |          |             |          |          |              |          |          |      |
| Feeling the need to share science knowledge gain               |          |             |          |          |              |          |          |      |
| Valuing impact on others' awareness                            |          |             |          |          |              |          |          |      |
| Wanting people to know the diversity around them               |          |             |          |          |              |          |          |      |
| Wanting to do more to help nature                              |          |             |          |          |              |          |          |      |
| Wanting to know if efforts are helping                         |          |             |          |          |              |          |          |      |
| ▼ Supporting and conserving nature                             |          |             |          |          |              |          |          |      |
| Creating habitat for pollinators as part of larger effort      |          |             |          |          |              |          |          |      |
| Doing something to help nature                                 |          |             |          |          |              |          |          |      |
| Emphasizing bumble bee species acknowledgment                  |          |             |          |          |              |          |          |      |
| Maintaining the habitat we have                                |          |             |          |          |              |          |          |      |
| Trying to do more for animals on property                      |          |             |          |          |              |          |          |      |
| ▼ Getting "involved at a higher level"                         |          |             |          |          |              |          |          |      |
| Doing something useful                                         |          |             |          |          |              |          |          |      |
| Contributing research "with some kind of research"             |          |             |          |          |              |          |          |      |
| Doing more than just observing                                 |          |             |          |          |              |          |          |      |
| Doing something small and still having impact                  |          |             |          |          |              |          |          |      |
| Exciting to impact academic institutions                       |          |             |          |          |              |          |          |      |
| Exciting to impact community attitudes and actions             |          |             |          |          |              |          |          |      |
| Exciting to impact government policymakers                     |          |             |          |          |              |          |          |      |
| Hoping to impact attitudes and policies                        |          |             |          |          |              |          |          |      |
| Participating in citizen science to advance bumble bee science |          |             |          |          |              |          |          |      |
| Supporting far reaching effects                                |          |             |          |          |              |          |          |      |
| Valuing collaboration with academia                            |          |             |          |          |              |          |          |      |
| Valuing current research involvement                           |          |             |          |          |              |          |          |      |
| ▼ Education pathway                                            |          |             |          |          |              |          |          |      |

| Code System                                               | Ellen... | Charles ... | Anne ... | Carol... | Katherine... | Lois ... | 2014 ... | 2015 |
|-----------------------------------------------------------|----------|-------------|----------|----------|--------------|----------|----------|------|
| ▶  QUESTIONS                                              |          |             |          |          |              |          |          |      |
| ▶  Following citizen scientist protocol                   |          |             |          |          |              |          |          |      |
| ▶  Learning with citizen science participation            |          |             |          |          |              |          |          |      |
| ▶  Enacting environmental changes through citizen science |          |             |          |          |              |          |          |      |
| ▶  Experiencing internal impacts through citizen science  |          |             |          |          |              |          |          |      |
| ▶  Cascading impacts of citizen scientists                |          |             |          |          |              |          |          |      |
| ▶  Being "about nature"                                   |          |             |          |          |              |          |          |      |
| ▼  Reasons for getting involved                           |          |             |          |          |              |          |          |      |
| ▶  Getting excited about science                          |          |             |          |          |              |          |          |      |
| ▶  Being part of a larger effort                          |          |             |          |          |              |          |          |      |
| ▼  Education pathway                                      |          |             |          |          |              |          |          |      |
| Seeking science venues                                    |          |             |          |          |              |          |          |      |
| Teaching as an entry into citizen science                 |          |             |          |          |              |          |          |      |
| Wanting to continue own education                         |          |             |          |          |              |          |          |      |
| ▼  Hobby pathway                                          |          |             |          |          |              |          |          |      |
| Barreling participation in citizen science                |          |             |          |          |              |          |          |      |
| Photodocumenting and hobby as entry into citize           |          |             |          |          |              |          |          |      |
| Sending photos where they'll be used                      |          |             |          |          |              |          |          |      |
| ▼  Social pathways                                        |          |             |          |          |              |          |          |      |
| Discovering Bumble Boosters on Facebook                   |          |             |          |          |              |          |          |      |
| Finding new citizen science through friend                |          |             |          |          |              |          |          |      |
| Getting involved was a natural step                       |          |             |          |          |              |          |          |      |
| Increasing interest with daughter's interest              |          |             |          |          |              |          |          |      |
| Joining because of family member's interest               |          |             |          |          |              |          |          |      |
| Meeting people with similar interests                     |          |             |          |          |              |          |          |      |
| ▶  Broadcasting citizen science educational objectives    |          |             |          |          |              |          |          |      |
| ▶  Assuming the role of expert                            |          |             |          |          |              |          |          |      |
| ▶  Tempering fear of insects                              |          |             |          |          |              |          |          |      |
| ▶  Experiencing the trying sides of science               |          |             |          |          |              |          |          |      |
| ▶  Enjoying the act of learning science                   |          |             |          |          |              |          |          |      |
| ▶  Glass ceilings in citizen science                      |          |             |          |          |              |          |          |      |
| ▶  Journaling to connect with nature                      |          |             |          |          |              |          |          |      |
| ▶  Thinking and acting scientifically                     |          |             |          |          |              |          |          |      |
| ▶  Describing a scientist                                 |          |             |          |          |              |          |          |      |
| ▶  Existing aversion to insecticides                      |          |             |          |          |              |          |          |      |

| Code System                                            | Ellen... | Charles ... | Anne ... | Carol... | Katherine... | Lois ... | 2014 ... | 2015 |
|--------------------------------------------------------|----------|-------------|----------|----------|--------------|----------|----------|------|
| ▼  Broadcasting citizen science educational objectives |          |             |          |          |              |          |          |      |
| Calling for more citizen engagement in science         |          |             |          |          | ■            |          |          |      |
| ▼  Encouraging others to join citizen science          |          |             |          |          |              |          |          |      |
| Encouraging siser in law to engage children            |          |             |          |          | ■            |          |          |      |
| Encouraging sister to plant natives                    |          |             |          |          | ■            |          |          |      |
| ▼  Advocating for bees and insects                     |          |             |          |          | ■            |          |          |      |
| Advocating for native plant diversity                  |          |             |          |          |              | ■        |          |      |
| Sharing passion for native plants with family          |          |             |          |          | ■            |          |          |      |
| Sharing pollinators through Facebook                   |          |             |          |          |              | ■        |          |      |
| ▼  Making others aware is "a good thing"               |          |             | ■        |          |              |          |          |      |
| Seeing importance of bees in "more spheres"            |          |             | ■        |          |              |          |          |      |
| Specifying pathway to adults change in environm        |          |             |          | ■        |              |          |          |      |
| ▼  Sharing citizen science with colleagues             |          |             |          |          |              |          |          |      |
| Captivating interest of colleagues at school           |          |             | ■        |          |              |          |          |      |
| Discussing citizen science with teachers at work       |          |             | ■        |          |              |          |          |      |
| Exposing coworkers to citizen science                  |          |             |          |          | ■            |          |          |      |
| Sharing knowledge with Master Naturalists              |          |             |          | ■        |              |          |          |      |
| ▼  Talking purposefully about citizen science          |          |             |          |          |              |          |          |      |
| Ensuing conversations about nature and children        |          |             |          |          | ■            |          |          |      |
| Explaining citizen science participation               |          |             |          |          | ■            |          |          |      |
| Sharing citizen science project with others            |          |             | ■        |          |              |          |          |      |
| Sharing citizen science through every day conver       |          | ■           | ■        |          |              |          |          |      |
| Sharing domicile with others                           |          |             |          |          | ■            | ■        |          |      |
| Sharing love of nature with people around me           |          |             |          |          | ■            |          |          |      |
| Sharing project with coworkers                         |          |             |          |          | ■            |          |          |      |
| Sharing project with sister-in-law                     |          |             |          |          | ■            |          |          |      |
| Talking purposefully about value of insects            |          | ■           |          |          | ■            |          |          |      |
| Talking to friends, neighbors, and family about th     | ■        |             |          |          | ■            |          |          |      |
| Talking to several people about citizen science pr     |          | ■           |          |          |              |          |          |      |
| ▶  Teaching the public about native bees               |          | ■           | ■        | ■        |              | ■        |          |      |
| ▶  Assuming the role of expert                         |          | ■           | ■        | ■        |              |          |          |      |
| ▶  Tempering fear of insects                           | ■        | ■           | ■        | ■        | ■            | ■        |          |      |
| ▶  Experiencing the trying sides of science            |          | ■           | ■        | ■        | ■            | ■        |          |      |
| ▶  Enjoying the act of learning science                |          | ■           | ■        | ■        | ■            |          |          |      |
| ▶  Glass ceilings in citizen science                   |          |             |          | ■        |              |          |          |      |

| Code System                                               | Ellen... | Charles ... | Anne ... | Carol... | Katherine... | Lois ... | 2014 ... | 2015 |
|-----------------------------------------------------------|----------|-------------|----------|----------|--------------|----------|----------|------|
| ▶  QUESTIONS                                              |          |             |          |          |              |          |          |      |
| ▶  Following citizen scientist protocol                   |          |             |          |          |              |          |          |      |
| ▶  Learning with citizen science participation            |          |             |          |          |              |          |          |      |
| ▶  Enacting environmental changes through citizen science |          |             |          |          |              |          |          |      |
| ▶  Experiencing internal impacts through citizen science  |          |             |          |          |              |          |          |      |
| ▶  Cascading impacts of citizen scientists                |          |             |          |          |              |          |          |      |
| ▶  Being "about nature"                                   |          |             |          |          |              |          |          |      |
| ▶  Reasons for getting involved                           |          |             |          |          |              |          |          |      |
| ▼  Broadcasting citizen science educational objectives    |          |             |          |          |              |          |          |      |
| Calling for more citizen engagement in science            |          |             |          |          |              |          |          |      |
| ▶  Encouraging others to join citizen science             |          |             |          |          |              |          |          |      |
| ▶  Advocating for bees and insects                        |          |             |          |          |              |          |          |      |
| ▶  Making others aware is "a good thing"                  |          |             |          |          |              |          |          |      |
| ▶  Sharing citizen science with colleagues                |          |             |          |          |              |          |          |      |
| ▶  Talking purposefully about citizen science             |          |             |          |          |              |          |          |      |
| ▼  Teaching the public about native bees                  |          |             |          |          |              |          |          |      |
| Describing others reaction to involvement in citizi       |          |             |          |          |              |          |          |      |
| Educating others about backyard ecology                   |          |             |          |          |              |          |          |      |
| Inviting us to come to Texas to speak                     |          |             |          |          |              |          |          |      |
| Noticing interest in people despite initial shock         |          |             |          |          |              |          |          |      |
| Organizing monthly speakers for Master Naturalis          |          |             |          |          |              |          |          |      |
| Seeing people as interested and wanting to learn          |          |             |          |          |              |          |          |      |
| ▶  Assuming the role of expert                            |          |             |          |          |              |          |          |      |
| ▶  Tempering fear of insects                              |          |             |          |          |              |          |          |      |
| ▶  Experiencing the trying sides of science               |          |             |          |          |              |          |          |      |
| ▶  Enjoying the act of learning science                   |          |             |          |          |              |          |          |      |
| ▶  Glass ceilings in citizen science                      |          |             |          |          |              |          |          |      |
| ▶  Journaling to connect with nature                      |          |             |          |          |              |          |          |      |
| ▶  Thinking and acting scientifically                     |          |             |          |          |              |          |          |      |
| ▶  Describing a scientist                                 |          |             |          |          |              |          |          |      |
| ▶  Existing aversion to insecticides                      |          |             |          |          |              |          |          |      |

| Code System                                               | Ellen... | Charles ... | Anne ... | Carol... | Katherine... | Lois ... | 2014 ... | 2015 |
|-----------------------------------------------------------|----------|-------------|----------|----------|--------------|----------|----------|------|
| ▶  Enacting environmental changes through citizen science |          |             | ■        | ■        | ■            | ■        |          |      |
| ▶  Experiencing internal impacts through citizen science  | ■        | ■           | ■        | ■        | ■            | ■        |          |      |
| ▶  Cascading impacts of citizen scientists                |          | ■           | ■        | ■        | ■            | ■        |          |      |
| ▶  Being "about nature"                                   | ■        | ■           | ■        | ■        | ■            | ■        |          |      |
| ▶  Reasons for getting involved                           | ■        | ■           | ■        | ■        | ■            | ■        |          |      |
| ▶  Broadcasting citizen science educational objectives    | ■        | ■           | ■        | ■        | ■            | ■        |          |      |
| ▼  Assuming the role of expert                            |          |             | ■        |          |              |          |          |      |
| ▼  Achieving expertise                                    |          |             |          |          |              |          |          |      |
| Achieving expertise in bumble bees                        |          |             |          | ■        |              |          |          |      |
| Achieving expertise in monarchs                           |          |             |          | ■        |              |          |          |      |
| Collecting monarch larvae for other teachers              |          |             |          | ■        |              |          |          |      |
| Feeling confident with bumble bee identification          |          |             |          | ■        |              |          |          |      |
| ▼  Being called upon by peers                             |          |             |          |          |              |          |          |      |
| Becoming entomologist expert for Master Natural           |          |             |          | ■        |              |          |          |      |
| Being called on to teach insects by other teacher         |          |             |          | ■        |              |          |          |      |
| Being called up by peers for science knowledge            |          |             |          | ■        |              |          |          |      |
| Being called upon for insect ID by other teachers         |          |             |          | ■        |              |          |          |      |
| Receiving funny looks for participation in project        |          | ■           |          |          |              |          |          |      |
| ▼  Identifying as an expert                               |          |             |          |          |              |          |          |      |
| Defining a scientist                                      |          |             |          | ■        |              |          |          |      |
| Defining citizen scientists                               |          |             |          | ■        |              |          |          |      |
| Describing skills that make someone a scientist           |          |             |          | ■        |              |          |          |      |
| Distinguishing 'real' scientists                          |          |             |          | ■        |              |          |          |      |
| Enjoying role of expert                                   |          |             | ■        |          |              |          |          |      |
| Identifying self as a scientist                           |          |             |          | ■        |              |          |          |      |
| Initially seeing a scientist as "someone else"            |          |             |          | ■        |              |          |          |      |
| Seeing new role as evidence of change in self             |          |             | ■        |          |              |          |          |      |
| ▶  Tempering fear of insects                              | ■        | ■           | ■        | ■        | ■            | ■        |          |      |
| ▶  Experiencing the trying sides of science               |          | ■           | ■        | ■        | ■            | ■        |          |      |
| ▶  Enjoying the act of learning science                   |          | ■           | ■        | ■        | ■            |          |          |      |
| ▶  Glass ceilings in citizen science                      |          |             |          | ■        |              |          |          |      |
| ▶  Journaling to connect with nature                      |          |             |          | ■        | ■            | ■        |          |      |
| ▶  Thinking and acting scientifically                     | ■        | ■           | ■        | ■        | ■            | ■        |          |      |
| ▶  Describing a scientist                                 |          | ■           |          |          |              | ■        |          |      |
| ▶  Existing aversion to insecticides                      |          |             |          | ■        |              |          |          |      |

| Code System                                            | Ellen... | Charles ... | Anne ... | Carol... | Katherine... | Lois ... | 2014 ... | 2015 |
|--------------------------------------------------------|----------|-------------|----------|----------|--------------|----------|----------|------|
| ▶  Cascading impacts of citizen scientists             |          | ■           | ■        | ■        | ■            | ■        |          |      |
| ▶  Being "about nature"                                | ■        | ■           | ■        | ■        | ■            | ■        |          |      |
| ▶  Reasons for getting involved                        | ■        | ■           | ■        | ■        | ■            | ■        |          |      |
| ▶  Broadcasting citizen science educational objectives | ■        | ■           | ■        | ■        | ■            | ■        |          |      |
| ▶  Assuming the role of expert                         |          | ■           | ■        | ■        |              |          |          |      |
| ▼  Tempering fear of insects                           |          |             |          |          |              |          |          |      |
| ▼  Recalling negative experiences with bees/insects    | ■        |             |          |          |              | ■        |          |      |
| Fearing bees                                           | ■        |             |          |          |              | ■        |          |      |
| Keeping distance from bees                             |          |             |          |          |              | ■        |          |      |
| Recalling disgust of flies and roaches                 |          |             |          | ■        |              |          |          |      |
| Recalling past opinion of insects as pests             |          |             | ■        |          |              |          |          |      |
| ▼  Having "second thoughts" about insects              | ■        |             |          |          |              |          |          |      |
| Sharing new found interest in insects and bees         |          |             |          |          |              |          |          |      |
| Enjoying insect presence                               |          |             |          |          |              |          |          |      |
| Becoming a beekeeper                                   |          |             |          |          |              |          |          |      |
| Changing reaction to bees/insects                      | ■        |             |          | ■        |              | ■        |          |      |
| Compromising bees and fear                             | ■        |             |          |          |              | ■        |          |      |
| Countering fear of stinging pollinators                |          |             |          |          |              | ■        |          |      |
| Recalling own change in noticing beehives              |          |             | ■        |          |              |          |          |      |
| ▼  Appreciating value and role of bees                 | ■        |             |          |          |              |          |          |      |
| Seeing bees as God's creatures                         | ■        |             |          |          |              |          |          |      |
| "Knowing it's name"                                    |          |             |          | ■        |              |          |          |      |
| Acknowledging diversity of flies                       |          |             |          | ■        |              |          |          |      |
| Acknowledging ecological role of all living things     |          |             |          | ■        |              |          |          |      |
| Acknowledging neutrality of bees                       |          |             |          |          |              | ■        |          |      |
| Connecting bees with affinity for nature               |          |             |          |          |              | ■        |          |      |
| Defending stinging pollinators                         |          | ■           |          |          |              | ■        |          |      |
| Describing docile nature of bees                       |          |             |          |          |              | ■        |          |      |
| Likening beneficial value of flies to bees             |          |             |          | ■        |              |          |          |      |
| ▼  Assessing negative public perceptions of bees       |          | ■           | ■        | ■        |              |          |          |      |
| Assessing fear of insects in parents                   |          |             |          | ■        |              |          |          |      |
| Describing general disconnect between people, b        |          |             | ■        |          |              |          |          |      |
| Describing others fear of insects                      |          | ■           |          |          | ■            |          |          |      |
| ▶  Experiencing the trying sides of science            |          | ■           | ■        | ■        | ■            | ■        |          |      |
| ▶  Enjoying the act of learning science                |          | ■           | ■        | ■        | ■            |          |          |      |
| ▶  Glass ceilings in citizen science                   |          |             |          | ■        |              |          |          |      |

| Code System                                              | Ellen... | Charles ... | Anne ... | Carol... | Katherine... | Lois ... | 2014 ... | 2015 |
|----------------------------------------------------------|----------|-------------|----------|----------|--------------|----------|----------|------|
| ▶  Experiencing internal impacts through citizen science | ■        | ■           | ■        | ■        | ■            | ■        |          |      |
| ▶  Cascading impacts of citizen scientists               |          | ■           | ■        | ■        | ■            | ■        |          |      |
| ▶  Being "about nature"                                  | ■        | ■           | ■        | ■        | ■            | ■        |          |      |
| ▶  Reasons for getting involved                          | ■        | ■           | ■        | ■        | ■            | ■        |          |      |
| ▶  Broadcasting citizen science educational objectives   | ■        | ■           | ■        | ■        | ■            | ■        |          |      |
| ▶  Assuming the role of expert                           |          | ■           | ■        | ■        |              |          |          |      |
| ▶  Tempering fear of insects                             | ■        | ■           | ■        | ■        | ■            | ■        |          |      |
| ▼  Experiencing the trying sides of science              |          |             |          |          |              |          |          |      |
| Acknowledging possibility of failure in design approach  |          | ■           |          |          |              |          |          |      |
| Acknowledging preconceptions of science                  |          |             |          |          |              | ■        |          |      |
| Being disappointed in negative results                   |          |             |          |          |              | ■        |          |      |
| Experiencing trial and error of science                  |          |             |          |          | ■            |          |          |      |
| Expressing concern about perceived validity of obser     |          |             |          | ■        |              |          |          |      |
| Feeling dismayed by larvae disappearing                  |          |             |          | ■        |              |          |          |      |
| Feeling impatient about negative results                 |          |             |          |          |              | ■        |          |      |
| Feeling more successful if occupancy rate were high      |          | ■           |          |          |              |          |          |      |
| Having an unsuccessful attempt at domicile inhabitar     |          | ■           |          |          |              |          |          |      |
| Hoping for better success in coming year                 |          | ■           |          |          |              |          |          |      |
| Hoping for domicile inhabitants                          |          |             |          |          |              | ■        |          |      |
| Leaving Monarch Larva Monitoring                         |          |             |          | ■        |              |          |          |      |
| Looking forward to new season despite previous failur    |          | ■           |          |          |              |          |          |      |
| Observing negative results                               |          |             | ■        |          |              |          |          |      |
| Realizing how time consuming science can be              |          |             | ■        |          |              |          |          |      |
| Responding to larval disappearance                       |          |             |          | ■        |              |          |          |      |
| Seeing failure as enlightenment                          |          |             | ■        |          |              |          |          |      |
| Seeing science in a new way                              |          |             |          |          |              | ■        |          |      |
| Trying again                                             |          | ■           |          |          |              |          |          |      |
| Trying to be patient with experiment                     |          |             |          |          |              | ■        |          |      |
| Using failure to direct future attempts                  |          |             | ■        |          |              |          |          |      |
| ▶  Enjoying the act of learning science                  |          | ■           | ■        | ■        | ■            |          |          |      |
| ▶  Glass ceilings in citizen science                     |          |             |          | ■        |              |          |          |      |
| ▶  Journaling to connect with nature                     |          |             |          | ■        | ■            | ■        |          |      |
| ▶  Thinking and acting scientifically                    | ■        | ■           | ■        | ■        | ■            | ■        |          |      |
| ▶  Describing a scientist                                |          | ■           |          |          |              | ■        |          |      |
| ▶  Existing aversion to insecticides                     |          |             |          | ■        |              |          |          |      |

| Code System                                       | Ellen ... | Charl... | Anne ... | Carol... | Kathe... | Lois B... | 20 |
|---------------------------------------------------|-----------|----------|----------|----------|----------|-----------|----|
| ▼  QUESTIONS                                      |           |          |          |          |          |           |    |
| Participation change over the years?              |           |          |          |          |          |           |    |
| Like least?                                       |           |          |          |          |          |           |    |
| Enjoy most?                                       |           |          |          |          |          |           |    |
| Strong memories?                                  |           |          |          |          |          |           |    |
| Changed the way you do things?                    |           |          |          |          |          |           |    |
| Views on insects?                                 |           |          |          |          |          |           |    |
| How science works?                                |           |          |          |          |          |           |    |
| Long term interest in nature?                     |           |          |          |          |          |           |    |
| Benefitting from participation?                   |           |          |          |          |          |           |    |
| Instances of sharing?                             |           |          |          |          |          |           |    |
| Reflect on what you do?                           |           |          |          |          |          |           |    |
| Describe your role in project                     |           |          |          |          |          |           |    |
| How you got involved                              |           |          |          |          |          |           |    |
| ▼  Following citizen scientist protocol           |           |          |          |          |          |           |    |
| Photographing bumble bee queen                    |           |          |          |          |          |           |    |
| Following project updates on Facebook             |           |          |          |          |          |           |    |
| ▶  Monarch Watch                                  |           |          |          |          |          |           |    |
| Observing domicile for inhabitants                |           |          |          |          |          |           |    |
| Observing no bee inhabitants                      |           |          |          |          |          |           |    |
| Obtaining a domicile                              |           |          |          |          |          |           |    |
| Placing Bumble Boosters domicile                  |           |          |          |          |          |           |    |
| Putting domicile together                         |           |          |          |          |          |           |    |
| Requesting domicile kit                           |           |          |          |          |          |           |    |
| Submitting data to project                        |           |          |          |          |          |           |    |
| Trying out a domicile                             |           |          |          |          |          |           |    |
| ▶  Using extra solitary bee house                 |           |          |          |          |          |           |    |
| Wanting guidance in setting up domicile correctly |           |          |          |          |          |           |    |
| ▼  Learning with citizen science participation    |           |          |          |          |          |           |    |
| Focusing outreach on favorite three insects       |           |          |          |          |          |           |    |
| ▼  Learning how to identify bumble bees           |           |          |          |          |          |           |    |
| Being persistent with learning bumble bee specie  |           |          |          |          |          |           |    |
| Collaborating with local bumble bee researcher    |           |          |          |          |          |           |    |
| Obtaining ID materials from an expert             |           |          |          |          |          |           |    |
| Seeking identification of bumble bee photos       |           |          |          |          |          |           |    |
