# Supplementary material
Source: MDPI journal article supplement (https://www.mdpi.com/1424-2818/13/8/339)
Supplement: s1 [file s1]

Document (Interview) portrait: Ellen

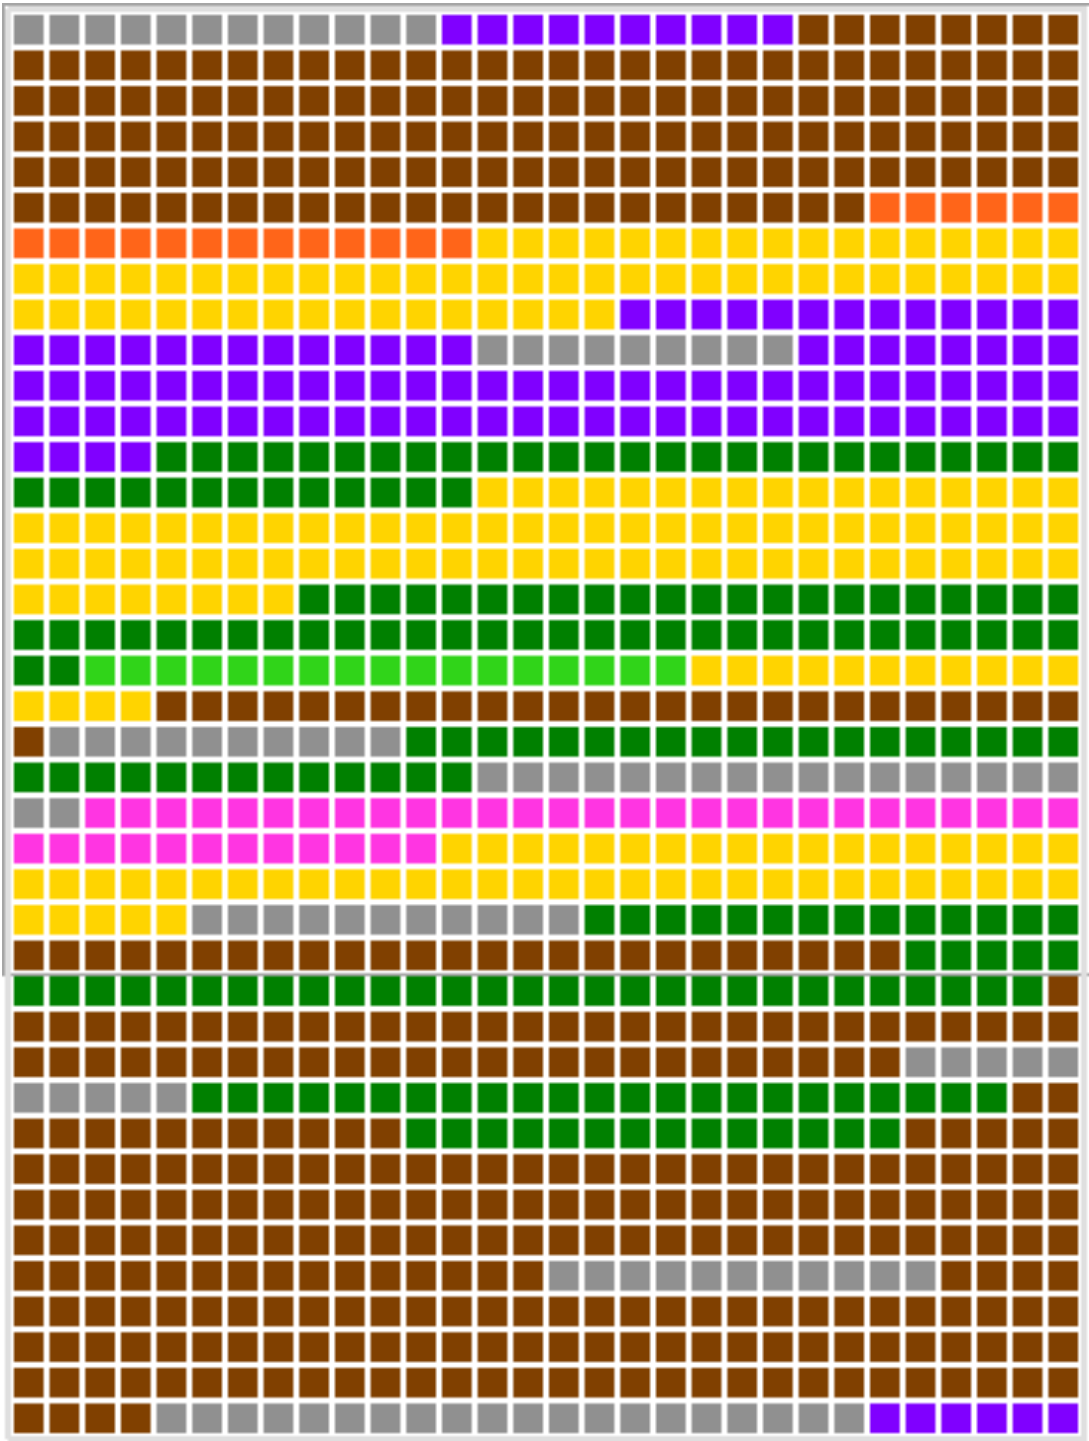

Generated using MAXQDA 12 software [VERBI Software-Consult-Sozialforschung GmbH, Berlin, Germany]

| Color Key to Conceptual Categories: |  |                                              |
|-------------------------------------|--|----------------------------------------------|
| Color                               |  | Category                                     |
| Light green                         |  | Maintaining a long-term interest in nature   |
| Brown                               |  | Tempering fear of insects                    |
| Orange                              |  | Following citizen scientist protocol         |
| Yellow                              |  | Thinking and acting scientifically           |
| Dark green                          |  | Experiencing internal impacts                |
| Purple                              |  | Barreling of citizen science and learning    |
| Pink                                |  | Sharing science knowledge and experiences    |
| Dark blue                           |  | Attributing expertise to a citizen scientist |
| Light blue                          |  | Assuming the role of expert                  |
| Red                                 |  | Influencing change in others                 |
| Gray                                |  | Interviewer questions                        |

Document (Interview) portrait: Charles

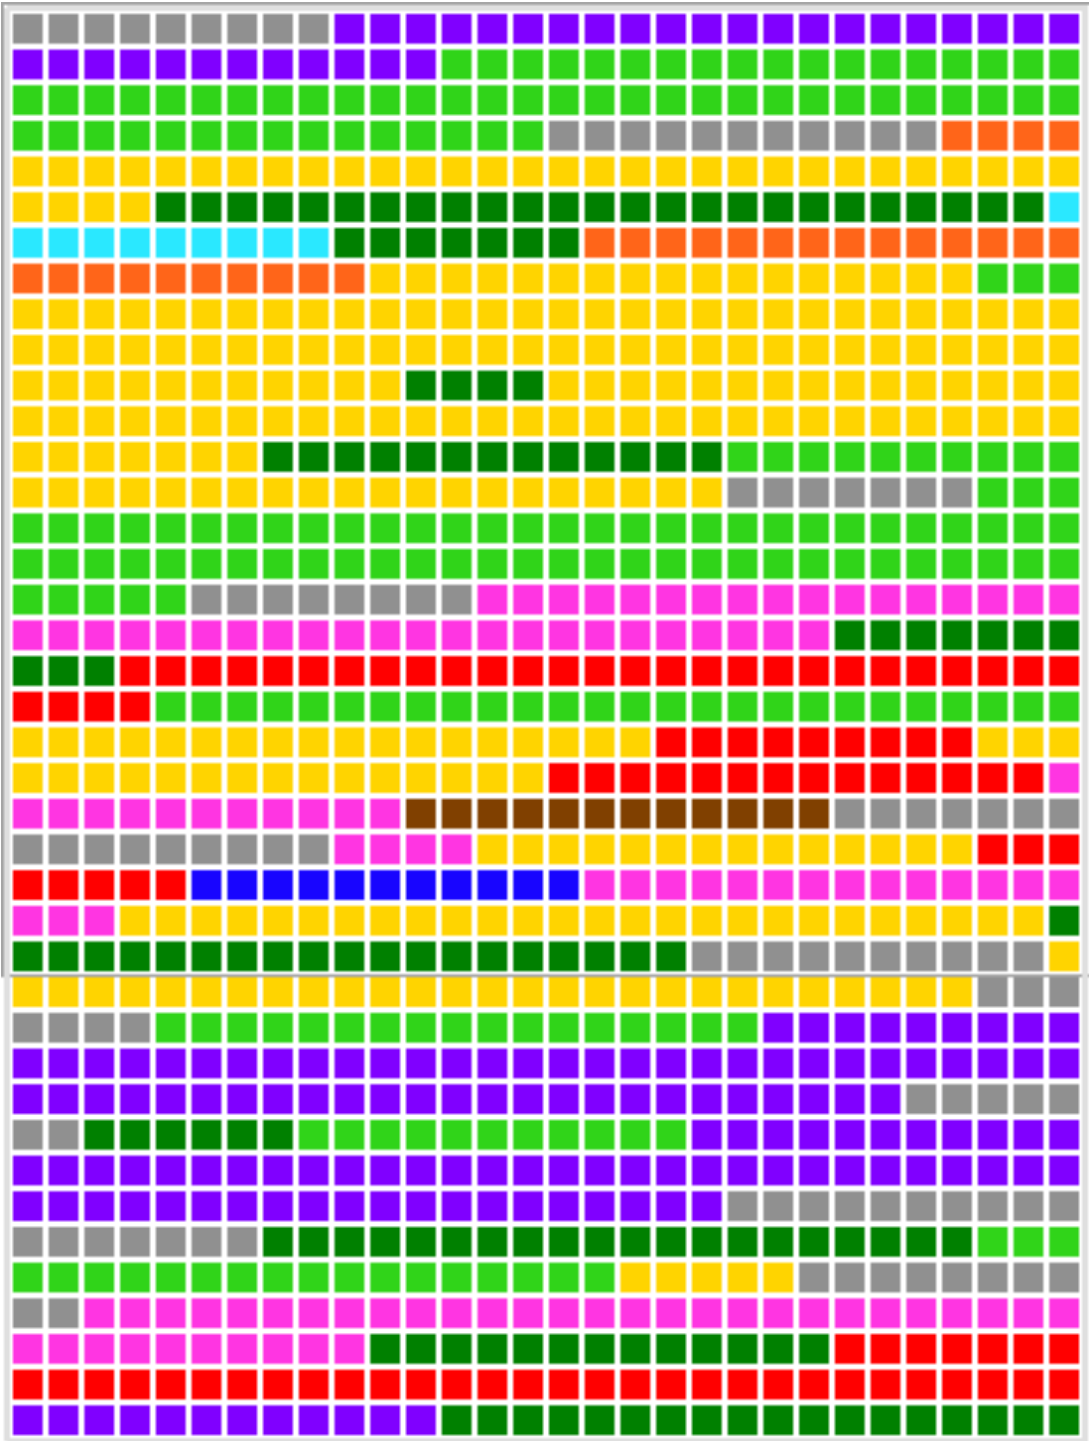

Generated using MAXQDA 12 software [VERBI Software-Consult-Sozialforschung GmbH, Berlin, Germany]

| Color Key to Conceptual Categories: |                                              |
|-------------------------------------|----------------------------------------------|
| Color                               | Category                                     |
| Light green                         | Maintaining a long-term interest in nature   |
| Brown                               | Tempering fear of insects                    |
| Orange                              | Following citizen scientist protocol         |
| Yellow                              | Thinking and acting scientifically           |
| Dark green                          | Experiencing internal impacts                |
| Purple                              | Barreling of citizen science and learning    |
| Pink                                | Sharing science knowledge and experiences    |
| Dark blue                           | Attributing expertise to a citizen scientist |
| Light blue                          | Assuming the role of expert                  |
| Red                                 | Influencing change in others                 |
| Gray                                | Interviewer questions                        |

Document (Interview) portrait: Carolyn

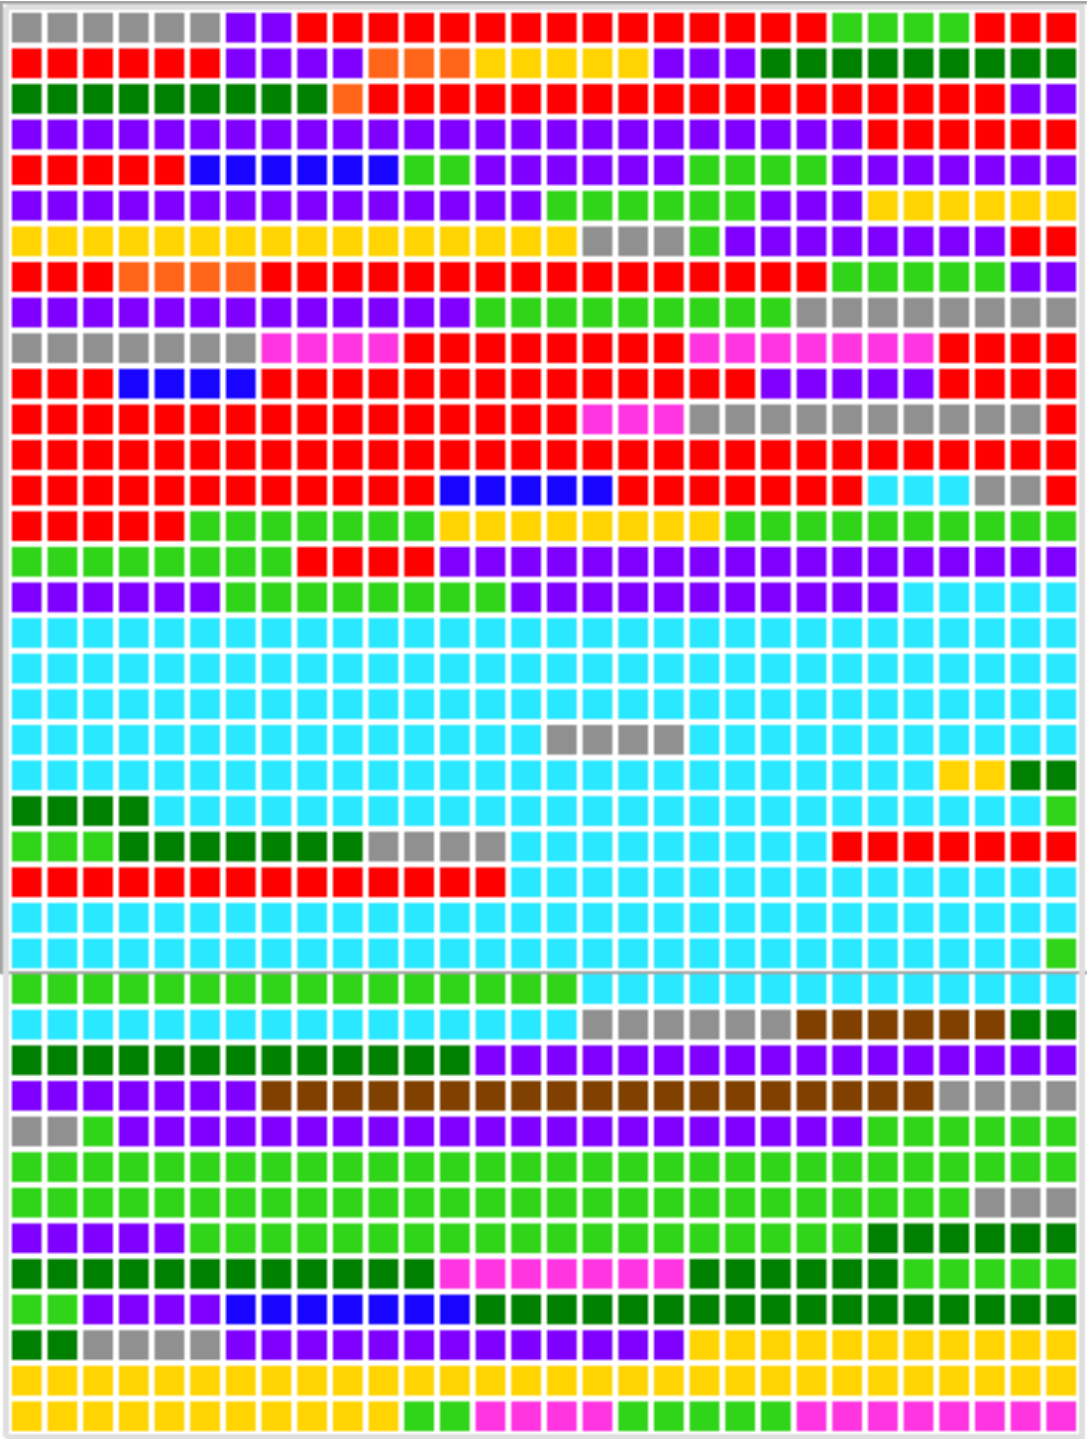

Generated using MAXQDA 12 software [VERBI Software-Consult-Sozialforschung GmbH, Berlin, Germany]

| Color Key to Conceptual Categories: |                                              |
|-------------------------------------|----------------------------------------------|
| Color                               | Category                                     |
| Light green                         | Maintaining a long-term interest in nature   |
| Brown                               | Tempering fear of insects                    |
| Orange                              | Following citizen scientist protocol         |
| Yellow                              | Thinking and acting scientifically           |
| Dark green                          | Experiencing internal impacts                |
| Purple                              | Barreling of citizen science and learning    |
| Pink                                | Sharing science knowledge and experiences    |
| Dark blue                           | Attributing expertise to a citizen scientist |
| Light blue                          | Assuming the role of expert                  |
| Red                                 | Influencing change in others                 |
| Gray                                | Interviewer questions                        |

Document (Interview) portrait: Anne

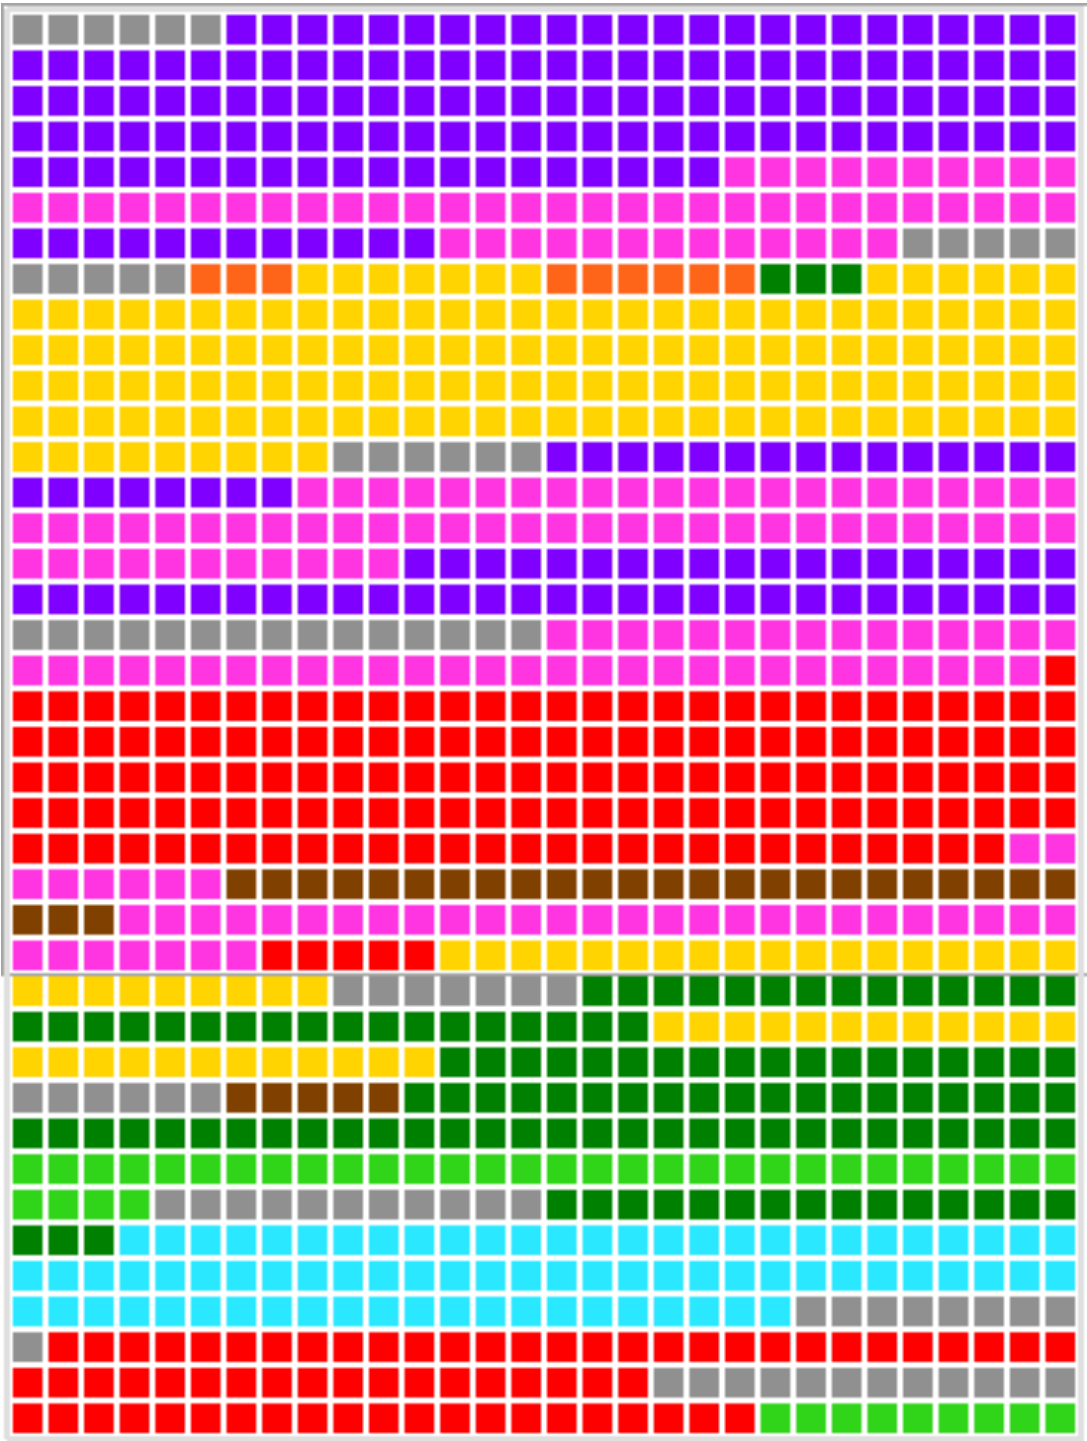

Generated using MAXQDA 12 software [VERBI Software-Consult-Sozialforschung GmbH, Berlin, Germany]

| Color Key to Conceptual Categories: |  |                                              |
|-------------------------------------|--|----------------------------------------------|
| Color                               |  | Category                                     |
| Light green                         |  | Maintaining a long-term interest in nature   |
| Brown                               |  | Tempering fear of insects                    |
| Orange                              |  | Following citizen scientist protocol         |
| Yellow                              |  | Thinking and acting scientifically           |
| Dark green                          |  | Experiencing internal impacts                |
| Purple                              |  | Barreling of citizen science and learning    |
| Pink                                |  | Sharing science knowledge and experiences    |
| Dark blue                           |  | Attributing expertise to a citizen scientist |
| Light blue                          |  | Assuming the role of expert                  |
| Red                                 |  | Influencing change in others                 |
| Gray                                |  | Interviewer questions                        |

## Document (Interview) portrait: Lois

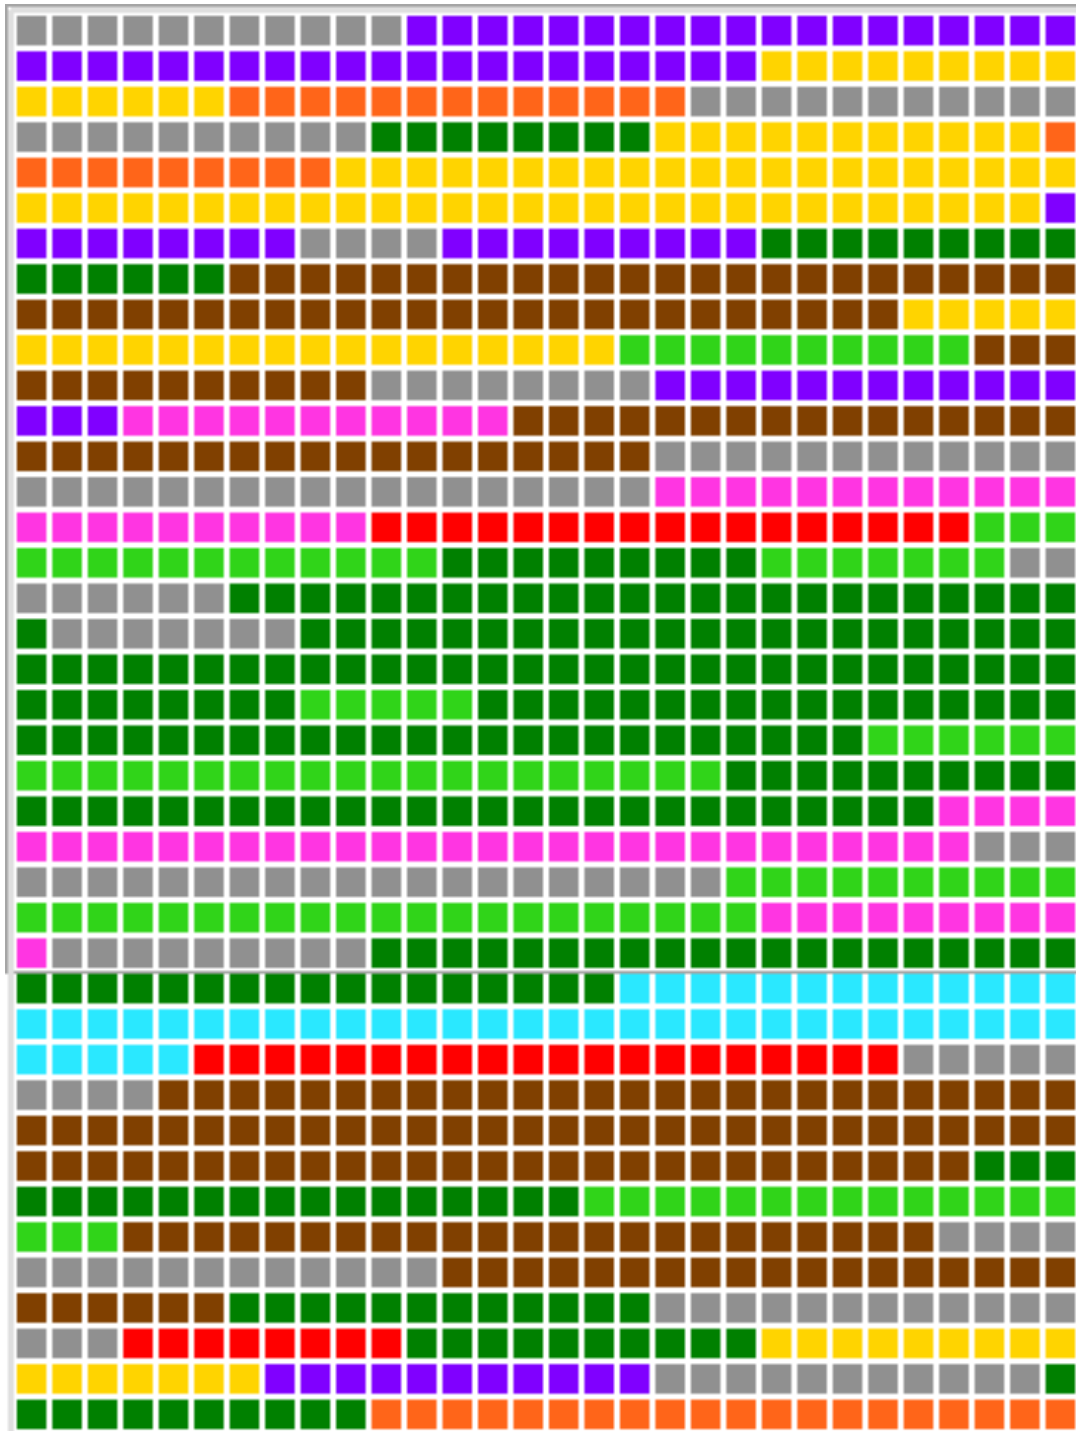

Generated using MAXQDA 12 software [VERBI Software-Consult-Sozialforschung GmbH, Berlin, Germany]

### Color Key to Conceptual Categories:

| Color       | Category                                     |
|-------------|----------------------------------------------|
| Light green | Maintaining a long-term interest in nature   |
| Brown       | Tempering fear of insects                    |
| Orange      | Following citizen scientist protocol         |
| Yellow      | Thinking and acting scientifically           |
| Dark green  | Experiencing internal impacts                |
| Purple      | Barreling of citizen science and learning    |
| Pink        | Sharing science knowledge and experiences    |
| Dark blue   | Attributing expertise to a citizen scientist |
| Light blue  | Assuming the role of expert                  |
| Red         | Influencing change in others                 |
| Gray        | Interviewer questions                        |

Document (Interview) portrait: Katherine

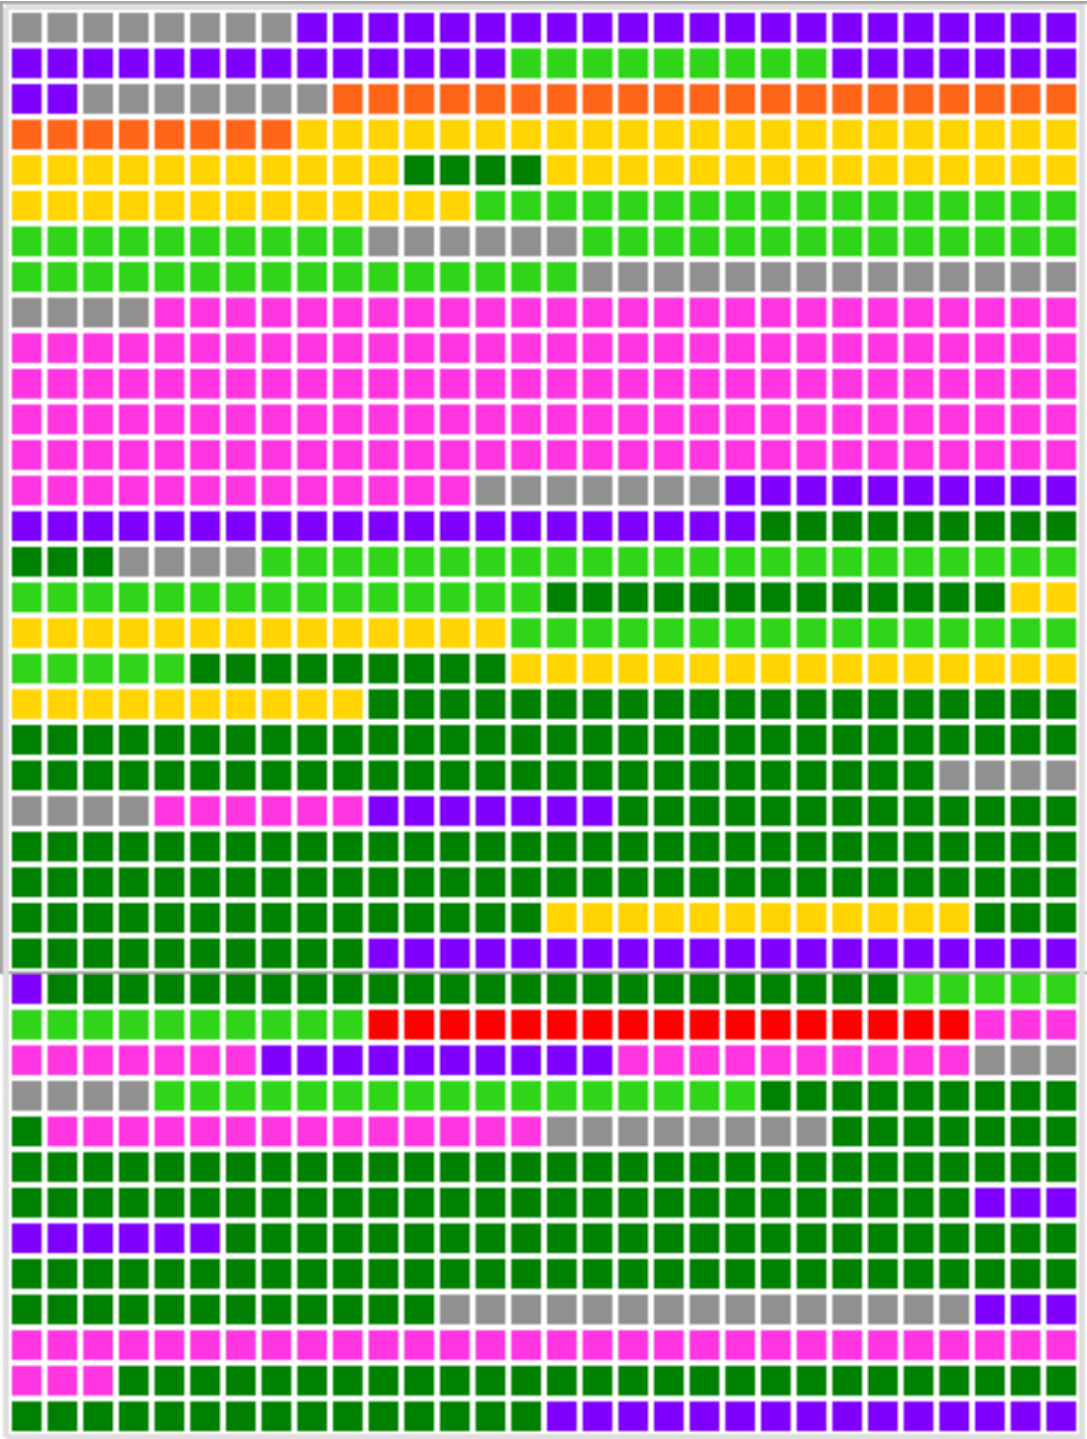

Generated using MAXQDA 12 software [VERBI Software-Consult-Sozialforschung GmbH, Berlin, Germany]

| Color Key to Conceptual Categories: |                                              |
|-------------------------------------|----------------------------------------------|
| Color                               | Category                                     |
| Light green                         | Maintaining a long-term interest in nature   |
| Brown                               | Tempering fear of insects                    |
| Orange                              | Following citizen scientist protocol         |
| Yellow                              | Thinking and acting scientifically           |
| Dark green                          | Experiencing internal impacts                |
| Purple                              | Barreling of citizen science and learning    |
| Pink                                | Sharing science knowledge and experiences    |
| Dark blue                           | Attributing expertise to a citizen scientist |
| Light blue                          | Assuming the role of expert                  |
| Red                                 | Influencing change in others                 |
| Gray                                | Interviewer questions                        |
